1 gen3sis: the general engine for eco-evolutionary  
2 simulations on the origins of biodiversity

3 Oskar Hagen<sup>1, 2 \*</sup>, Benjamin Flück<sup>1, 2</sup>, Fabian Fopp<sup>1, 2</sup>, Juliano S. Cabral<sup>3</sup>, Florian Hartig<sup>4</sup>,  
4 Mikael Pontarp<sup>5</sup>, Thiago F. Rangel<sup>6</sup>, Loïc Pellissier<sup>1, 2</sup>

5 <sup>1</sup> Landscape Ecology, Institute of Terrestrial Ecosystems, Department of Environmental Systems Science, ETH  
6 Zürich, Zürich, Switzerland

7 <sup>2</sup> Land Change Science Research Unit, Swiss Federal Institute for Forest, Snow and Landscape Research, WSL,  
8 Birmensdorf, Switzerland

9 <sup>3</sup> Ecosystem Modeling, Center for Computational and Theoretical Biology (CCTB), University of Würzburg, Clara-  
10 Oppenheimer-Weg 32, 97074 Würzburg, Germany

11 <sup>4</sup> Theoretical Ecology, University of Regensburg, Regensburg, Germany

12 <sup>5</sup> Department of Biology, Lund University, Biology Building, Sölvegatan 35, 223 62 Lund, Sweden

13 <sup>6</sup> Department of Ecology, Institute of Biological Sciences, Federal University of Goiás, Goiânia Brazil

14 \* Correspondence to [oskar@hagen.bio](mailto:oskar@hagen.bio)

## 15 **Abstract**

16 Understanding the origins of biodiversity has been an aspiration since the days of early  
17 naturalists. The immense complexity of ecological, evolutionary and spatial processes,  
18 however, has made this goal elusive to this day. Computer models serve progress in many  
19 scientific fields, but in the fields of macroecology and macroevolution, eco-evolutionary models  
20 are comparatively less developed. We present a general, spatially-explicit, eco-evolutionary  
21 engine with a modular implementation that enables the modelling of multiple macroecological  
22 and macroevolutionary processes and feedbacks across representative spatio-temporally  
23 dynamic landscapes. Modelled processes can include environmental filtering, biotic  
24 interactions, dispersal, speciation and evolution of ecological traits. Commonly observed  
25 biodiversity patterns, such as  $\alpha$ ,  $\beta$  and  $\gamma$  diversity, species ranges, ecological traits and  
26 phylogenies, emerge as simulations proceed. As a case study, we examined alternative  
27 hypotheses expected to have shaped the latitudinal diversity gradient (LDG) during the Earth's  
28 Cenozoic era. We found that a carrying capacity linked with energy was the only model variant  
29 that could simultaneously produce a realistic LDG, species range size frequencies, and  
30 phylogenetic tree balance. The model engine is open source and available as an R-package,  
31 enabling future exploration of various landscapes and biological processes, while outputs can  
32 be linked with a variety of empirical biodiversity patterns. This work represents a step towards  
33 a numeric and mechanistic understanding of the physical and biological processes that shape  
34 Earth's biodiversity.

## 35 **Keywords**

36 biodiversity, eco-evolution, latitudinal diversity gradient, mechanistic model, modelling  
37 framework

## 38 Introduction

39 Ecological and evolutionary processes have created various patterns of diversity in living  
40 organisms across the globe [1]. Species richness varies across regions, such as continents  
41 [2, 3], and along spatial and environmental gradients [4, 5], such as latitude [6, 7]. These well-  
42 known patterns, derived from the observed multitude of life forms on Earth, have intrigued  
43 naturalists for centuries [1, 8, 9] and stimulated the formulation of numerous hypotheses to  
44 explain their origin [e.g. 1, 6, 7, 10, 11-15]. Ecologists and evolutionary biologists have  
45 attempted to test and disentangle these hypotheses [16], for example via models of  
46 cladogenesis [17] or correlative spatial analyses [18, 19]. However, to this day, a mechanistic  
47 understanding of ecological, evolutionary and geodynamical spatial dynamics driving diversity  
48 patterns remains elusive [20, 21].

49 The complexity of interacting ecological, evolutionary and spatial processes limits our ability  
50 to formulate, test and apply the mechanisms forming biodiversity patterns [22, 23].  
51 Additionally, multiple processes act and interact with different relative strengths across spatio-  
52 temporal scales [20]. Current research suggests that allopatric [24-26] and ecological [22]  
53 speciation, dispersal [27] and adaptation [28] all act conjointly in interaction with the  
54 environment [29, 30], producing observed biodiversity patterns [31]. Comprehensive  
55 explanations of the origin and dynamics of biodiversity must therefore consider a large number  
56 of biological processes and feedbacks [32], including species' ecological and evolutionary  
57 responses to their dynamic abiotic environment, acting on both ecological and evolutionary  
58 time scales [20, 33]. Consequently, biodiversity patterns can rarely be explained by a single  
59 hypothesis, as the expectations of the various contending mechanisms are not clearly  
60 asserted [20, 34].

61 A decade ago, a seminal paper by Gotelli and colleagues [35] formulated the goal of  
62 developing a “general simulation model for macroecology and macroevolution” (hereafter  
63 computer models). Since then, many authors have reiterated this call for a broader use of

## gen3sis: engine for eco-evolutionary biodiversity modelling

64 computer models in biodiversity research [20, 36, 37]. With computer models, researchers can  
65 explore with simulations the implications of implemented hypotheses and mechanisms and  
66 evaluate whether emerging simulated patterns are compatible with observations. Several case  
67 studies have illustrated the feasibility and usefulness of computer models in guiding intuition  
68 for the interpretation of empirical data [24, 26, 38-42]. Moreover, models have reproduced  
69 realistic large-scale biodiversity patterns, such as along latitude [25, 43, 44], by considering  
70 climate and geological dynamics [24, 26, 42], and population isolation by considering dispersal  
71 ability and geographic distance [24-26, 38-42]. For example, computer models were used to  
72 examine how oceans' paleogeography influenced biodiversity dynamics in marine ecosystems  
73 [24, 41-43]. Nevertheless, the potential of computer models to enlighten the mechanisms  
74 underlying biodiversity patterns remains largely untapped.

75 Macroevolutionary studies have highlighted that patterns emerging from simulations are  
76 generally sensitive to the mechanisms implemented, and to the landscapes upon which those  
77 act [24, 25, 42, 43]. Systematically comparing and exploring the effects of mechanisms and  
78 landscapes, however, is often hindered by the lack of flexibility and idiosyncrasies of existing  
79 models. Most models implement, and thus test, only a limited set of evolutionary processes  
80 and hypotheses. Many models are designed for specific and therefore fixed purposes  
81 including spatial and temporal boundaries, ranging from the global [24, 25] to continental [26]  
82 or regional scale [39, 40], and in time, from millions of years [39, 40, 42, 43] to thousands of  
83 years [25, 26]. Moreover, previous eco-evolutionary population models were developed to test  
84 a fixed number of mechanisms [24, 25, 35, 40, 42, 44-50]. The diverse input and output  
85 formats and limited code availability [51], as well as the different algorithmic implementations,  
86 have reduced interoperability between hitherto available models. Biological hypotheses and  
87 landscapes should be compared within a common and standardized platform with the  
88 modularity required for flexible explorations of multiple landscapes and processes [35].  
89 Increased generality is thus a desirable feature of computer models that aim to explore the  
90 mechanisms and landscapes that shape biodiversity in dynamic systems such as rivers [52],

## gen3sis: engine for eco-evolutionary biodiversity modelling

91 oceans [41, 42], islands [39, 40, 53] and mountains [54, 55], or across gradients such as  
92 latitude [20, 25, 43].

93 Here, we present a modelling engine that offers the possibility to explore eco-evolutionary  
94 dynamics of lineages under a broad range of biological processes and landscapes. Simulated  
95 species populations occupy a spatial domain (hereafter site) bounded by a combination of  
96 geological, climatic and ecological factors. The sites occupied by a species define the species'  
97 realized geographic range (hereafter species range) [56]. The engine then tracks species  
98 populations over time, which can change as a result of dynamic environments, as well as  
99 species dispersal ability, ecological interactions, local adaptation and speciation. The initial  
100 species range and the criteria for speciation, dispersal, ecological interactions and trait  
101 evolution are adjustable mechanisms, allowing the integration of a wide range of hypotheses  
102 within the model. Given the flexibility of modifying both mechanisms and landscapes, we  
103 consider the engine a general tool and named it "general engine for eco-evolutionary  
104 simulations" (hereafter gen3sis). We highlight the potential of gen3sis as a flexible tool to gain  
105 inferences about the underlying processes behind biodiversity patterns by tackling a long-  
106 standing topic in evolutionary ecology: the latitudinal diversity gradient (LDG) [20]. We  
107 implement three alternative hypotheses proposed to explain the LDG [20]: (i) *time for species*  
108 *accumulation* [57-60], (ii) *diversification rates* i.e. depending on temperature [61, 62], and  
109 *ecological limits* i.e. depending on energetic carrying capacity [63, 64]. We compare simulation  
110 results to empirical distribution and phylogenetic patterns of major tetrapod clades (i.e.  
111 mammals, birds, amphibians and reptiles).

## 112 **Engine principles and scope**

113 Gen3sis is a modelling engine, developed for formalizing and testing multiple hypotheses  
114 about the emergence of biodiversity patterns. The engine simulates the consequences of  
115 multiple customizable processes and landscapes responsible for the appearance (speciation)  
116 and disappearance (extinction) of species over evolutionary time scales. Speciation and  
117 extinction emerge from ecological and evolutionary mechanisms dependent on dispersal,  
118 species interactions, trait evolution and geographic isolation processes. Customizable eco-  
119 evolutionary processes, which interact with dynamic landscapes, make it possible to adjust for  
120 various macro-eco-evolutionary hypotheses about specific taxonomic groups, ecosystem  
121 types or processes. We made the engine openly available to the research community in an R-  
122 package to catalyse an interdisciplinary exploration, application and quantification of the  
123 mechanisms behind biodiversity dynamics. The R statistical programming language and  
124 environment [65] is widely used for reproducible and open-source research, and since its  
125 origins it has been used for handling and analysing spatial data [66]. Gen3sis follows best  
126 practices for scientific computing [67], including high modularization; consistent naming, style  
127 and formatting; single and meaningful authoritative representation; automated workflows;  
128 version control; continuous integration; and extensive documentation.

129 Gen3sis operates over a grid-based landscape, either the entire globe or a specific region.  
130 The landscape used as input is defined by the shape of the colonizable habitat (e.g. land  
131 masses for terrestrial organisms), its environmental properties (e.g. temperature and aridity)  
132 and its connectivity to dispersal (e.g. the influence of barriers, such as rivers and oceans for  
133 terrestrial organisms). Gen3sis simulates species' population range dynamics, traits,  
134 diversification and spatial biodiversity patterns in response to geological, biological and  
135 environmental drivers. Using a combined trait-based and biological species concept, gen3sis  
136 tracks the creation, dynamics and extinction of species ranges, which are composed by a set  
137 of sites occupied by species populations. Eco-evolutionary dynamics are driven by user-

## gen3sis: engine for eco-evolutionary biodiversity modelling

138 specified landscapes and processes, including ecology, dispersal, speciation and evolution  
139 (Figure 1). Below we explain the gen3sis inputs, the configurations (including eco-evolutionary  
140 processes), and the landscapes defining the computer model, as well as user-defined outputs  
141 (Figure 1 C–F)

### 142 Inputs and initialization

143 Gen3sis has two input objects which define a particular model (Figure 1). These inputs are: (i)  
144 a dynamic landscape (Figure 1 A), which is further divided into environmental variables and  
145 distance matrices; and (ii) a configuration (Figure 1 B), in which the user can define initial  
146 conditions, biological functions and their parameter values, as well as technical settings for  
147 the model core.

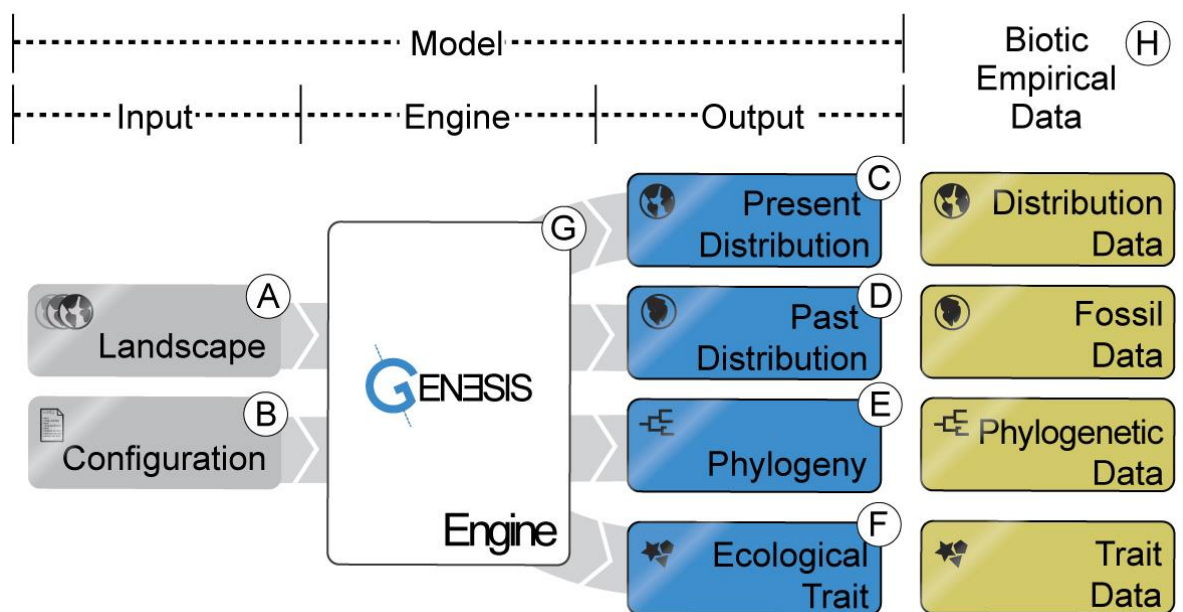

148  
149 **Figure 1.** Schematic of the main components of the computer model: (A, B) model inputs,  
150 including the spatio-temporal landscape objects and the configuration file; (C–F) model  
151 outputs, including present and past species ranges, phylogenetic relationships among  
152 species, and the ecological traits of species; (G) model engine containing the mechanics; and  
153 (H) empirical data applicable for model validation.

## 154 *Landscape*

155 The landscape objects (Figure 1 A) form the spatio-temporal context in which the processes  
156 of speciation, dispersal, evolution and ecology take place. Landscape objects are generated  
157 based on temporal sequences of landscapes in the form of raster files, which are summarized  
158 in the form of two classes. The first landscape class contains: (i) the geographic coordinates  
159 of the landscape sites, (ii) the corresponding information on which sites are generally suitable  
160 for a clade (e.g. land or ocean), and (iii) the environmental conditions (e.g. temperature and  
161 aridity). The landscape may be simplified into a single geographic axis [e.g. 68] for theoretical  
162 experiments, or it may consider realistic configurations aimed at reproducing real local or  
163 global landscapes [24, 69, 70]. The second landscape class defines the connectivity of the  
164 landscape, used for computing dispersal and consequently isolation of populations. By default,  
165 the connection cost between occupied sites is computed for each time-step from the gridded  
166 landscape data based on haversine geographic distances. This can be modified by a user-  
167 defined cost function in order to account for barriers with different strengths (e.g. based on  
168 elevation [69], water or land) or even to facilitate dispersal in specific directions (e.g. to account  
169 for currents and river flow directions). The final connection costs are stored as sparse distance  
170 matrices [71]. Distance matrices, containing the connection costs, are provided at every time-  
171 step as either: (i) a pre-computed full distance matrix, containing all habitable sites in the  
172 landscape (faster simulations but more storage required); or (ii) a local distance matrix,  
173 computed from neighbouring site distances up to a user-defined range limit (slower  
174 simulations but less storage required).



## gen3sis: engine for eco-evolutionary biodiversity modelling

### 175 *Configuration*

176 The configuration object (Figure 1 B) includes the customizable *initialization*, *observer*,  
177 *speciation*, *dispersal*, *evolution* and *ecology* functions. These six functions define a  
178 configuration applied in the simulation engine (Table 1). The possibility to customize these  
179 functions confers the high flexibility of gen3sis in terms of including a wide range of  
180 mechanisms, as illustrated by three configurations presented in a case study (Note S1, Table  
181 S1). Additionally, the configuration object lists the model settings, including: (i) whether a  
182 random seed is used, allowing simulation reproducibility; (ii) start and end times of the  
183 simulation; (iii) rules about aborting the simulation, including the maximum global or local  
184 species number allowed; and (iv) the list of ecological traits considered in the simulation. One  
185 or multiple traits can be defined, which should correspond to those used in the *ecology*  
186 function. Moreover, the *initialization* function creates the ancestor species at the start of the  
187 simulation. Users can define the number of ancestor species, their distribution within the  
188 ancient landscape and their initial trait values. With the *observer* function, changes over time  
189 in any abiotic or biotic information of the virtual world can be recorded by defining the outputs  
190 that are saved at specified time-steps. Outputs can be saved and plotted in real-time as the  
191 model runs. The core biological functions (i.e. *speciation*, *dispersal*, *evolution* and *ecology*)  
192 are presented below.

## 193 *Core functions and objects*

194 The states of the computer model are updated in discrete time-steps. At each time-step, the  
195 *speciation*, *dispersal*, *evolution* and *ecology* functions are executed sequentially (Figure 2).  
196 Speciation and extinction emerge from interactions across core functions. For example,  
197 speciation events are influenced by *speciation* function as well as by the *ecology* and *dispersal*  
198 functions that interact in a dynamic landscape, ultimately dictating populations' geographic  
199 isolation. Likewise, global extinctions depend on local extinctions, which are influenced by the  
200 *dispersal*, *evolution* and *ecology* functions that dictate adaptation and migration capacity.  
201 Internally, the computer model defines core objects of the simulations: species abundances;  
202 species trait values; the species divergence matrix between all populations for each species;  
203 and the phylogeny of all species created during the simulation. In the following sections, we  
204 describe the core processes in gen3sis, as well as their inputs and outputs. For a summary  
205 see Table 1.

206 Running a simulation in gen3sis consists of the following steps: (i) Read in the configuration  
207 object, prepare the output directories, load the initial landscape (Figure 2 A) and create the  
208 ancestor specie(s) (using the *initialization* function *create\_ancestor\_species*). (ii) Run the main  
209 loop over the landscape time-steps. At every time-step, the engine loads the appropriate  
210 landscape, removes all sites that became uninhabitable in the new time-step, and executes  
211 the core functions as defined by the configuration object (Figure 2 B). (iii) At the end of every  
212 time-step, gen3sis saves the species richness, genealogy and, if desired, the species,  
213 landscape and other customized observations that are defined in the *observer* function (e.g.  
214 summary statistics and species pattern plots). Core functions are modifiable and can account  
215 for a wide range of mechanisms, as illustrated in the case study (Notes S1 and S2).  
216 Conversely, functions can be turned off, for example in an ecologically neutral model. For a  
217 pseudo-code of gen3sis see Note S3.

gen3sis: engine for eco-evolutionary biodiversity modelling

A Landscape

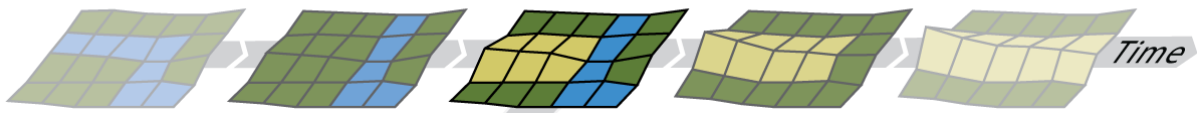

B Core processes

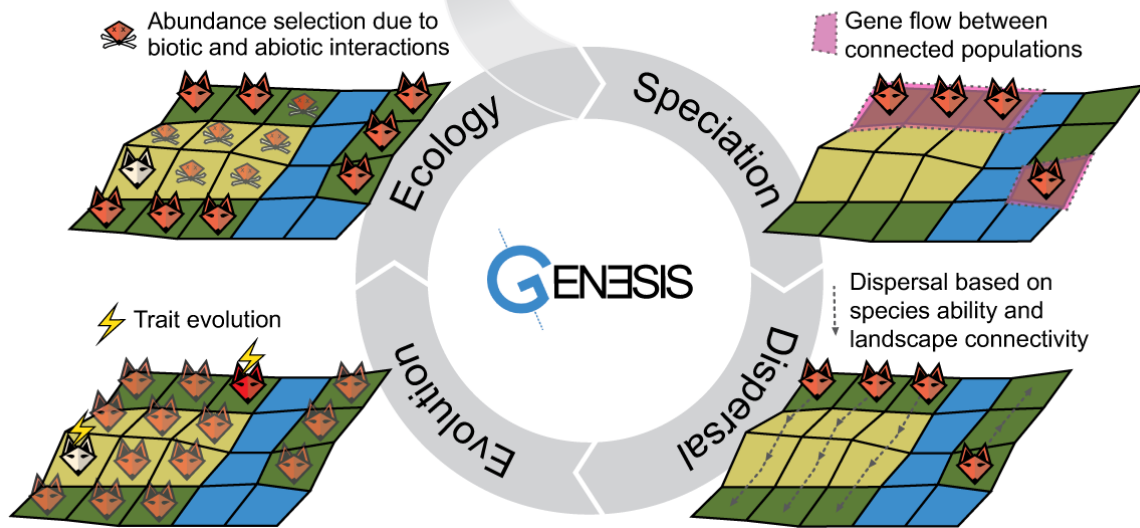

218

219 **Figure 2.** Schematic example of the *gen3sis* engine simulation cycle of one species'  
220 populations over a landscape evolution example containing highlands (yellow), lowlands  
221 (green) and a river acting as a barrier (blue). (A) Landscape. A time series of landscapes is  
222 used as input, with the landscape being updated after every time-step of the simulation cycle,  
223 i.e. after the ecology process. (B) Model core processes. First, the speciation process  
224 determines the divergence between geographic clusters of populations that are not connected  
225 and splits the clusters into new species if a threshold is reached. In this illustration, divergence  
226 between clusters of fox populations was not sufficient to trigger speciation. Second, in the  
227 dispersal process, the species spreads within a landscape to reachable new sites. In this  
228 illustration, the river limits dispersal. Third, the evolution process can modify the value of the  
229 traits in the populations. In this illustration, two fox populations show trait evolution in their  
230 ability to cope with the local environment (i.e. red and white fox populations). Fourth, the  
231 ecology process recalculates the abundance of the species in each site based on the abiotic  
232 condition and co-occurring species, possibly resulting in local extinctions. In this illustration,

gen3sis: engine for eco-evolutionary biodiversity modelling

233 *the red fox was unsuited to the lowlands while the white fox survived in the highlands.*  
 234 *Speciation and extinction events emerge from multiple simulation cycles of customizable*  
 235 *processes.*

236 **Table 1.** Presentation of the core functions of *speciation, dispersal, ecology and evolution*  
 237 implemented in gen3sis. The computation of core functions is customizable in the  
 238 configuration object. Shown are input objects that are combined to generate updated  
 239 outputs. The table corresponds to the mechanisms presented in Figure 2 B.

|                   | Objective                                                                                                       | Input                                                                                                         | Computation                                                                                                                                                                                                                                                                         | Output                                                                                          |
|-------------------|-----------------------------------------------------------------------------------------------------------------|---------------------------------------------------------------------------------------------------------------|-------------------------------------------------------------------------------------------------------------------------------------------------------------------------------------------------------------------------------------------------------------------------------------|-------------------------------------------------------------------------------------------------|
| <b>Speciation</b> |                                                                                                                 |                                                                                                               |                                                                                                                                                                                                                                                                                     |                                                                                                 |
|                   | Determines the divergence between geographic clusters of populations within a species; determines cladogenesis. | Species divergence matrix; species trait matrix; species abundance matrix; landscape values; distance matrix. | Divergence between geographically isolated clusters of populations increases over time while (re-)connected clusters decrease down to zero; speciation happens when the divergence between two clusters is above the speciation threshold, but can also consider trait differences. | Updated species divergence matrix; new species if speciation occurred; updated genealogy table. |
| <b>Dispersal</b>  |                                                                                                                 |                                                                                                               |                                                                                                                                                                                                                                                                                     |                                                                                                 |
|                   | Determines the colonization of vacant sites.                                                                    | Species trait matrix; species abundance matrix; landscape values; distance matrix.                            | Species disperse according to a unique value or a distribution of dispersal values.                                                                                                                                                                                                 | Updated species abundance matrix.                                                               |
| <b>Evolution</b>  |                                                                                                                 |                                                                                                               |                                                                                                                                                                                                                                                                                     |                                                                                                 |
|                   | Determines the change of species traits in each site, anagenesis.                                               | Species trait matrix; species abundance matrix; landscape values; geographic clusters; distance matrix.       | Traits might change for each species in the populations of occupied sites.                                                                                                                                                                                                          | Updated species trait matrix.                                                                   |
| <b>Ecology</b>    |                                                                                                                 |                                                                                                               |                                                                                                                                                                                                                                                                                     |                                                                                                 |
|                   | Determines the species abundance in each site.                                                                  | Species trait matrix; species abundance matrix; landscape values; genealogy.                                  | Change the species abundance, based on landscape environmental values and species co-occurrences; changes species trait values.                                                                                                                                                     | Updated species abundance matrix.                                                               |

## gen3sis: engine for eco-evolutionary biodiversity modelling

### 240 Speciation

241 **Core.** The *speciation* function iterates over every species separately, registers populations'  
242 geographic occupancy (species range), and determines when geographic isolation between  
243 population clusters is sufficient to trigger a lineage-splitting event of cladogenesis. A species'  
244 range can be segregated into spatially discontinuous geographic clusters of sites and is  
245 determined by multiple other processes. The clustering of occupied sites is based on the  
246 species' dispersal capacity and the landscape connection costs. Over time, disconnected  
247 clusters gradually accumulate incompatibility (divergence), analogous to genetic  
248 differentiation. Disconnected species population clusters that maintain geographic isolation for  
249 a prolonged period of time will result in different species after the differentiation threshold  $\kappa$  is  
250 reached (modelling Dobzhansky-Muller incompatibilities [72]). These clusters become two or  
251 more distinct species, and a divergence matrix reset follows. On the other hand, if geographic  
252 clusters come into secondary contact before the speciation occurs, they coalesce and  
253 incompatibilities are gradually reduced to zero.

254 **Non-exhaustive modification possibilities.** A customizable *speciation* function can further  
255 embrace processes that modulate speciation. Increased divergence values per time-step can  
256 be constant for all species or change depending on biotic and abiotic conditions, such as faster  
257 divergence between species occupying higher temperature sites [62], or they can be  
258 dependent on population size [73] or other attributes [74]. The function also takes the  
259 ecological traits as input, thus allowing for ecological speciation [22], where speciation  
260 depends on the divergence of ecological traits between – but not within – clusters [75].

### 261 Dispersal

262 **Core.** The *dispersal* function iterates over all species populations and determines the  
263 connectivity between sites and the colonization of new sites in the grid cell. Dispersal  
264 distances are drawn following a user-defined dispersal function and then compared with the  
265 distance between pairs of occupied and unoccupied sites. A unique dispersal value can be

## gen3sis: engine for eco-evolutionary biodiversity modelling

266 used (deterministic connection of sites) or dispersal values can be selected from a specified  
267 distribution (stochastic connection of sites). If the occupied to unoccupied site connection cost  
268 is lower than the dispersal distance, the dispersal is successful. If populations in multiple origin  
269 sites manage to colonize an unoccupied site, a colonizer is selected randomly to seed the  
270 traits for the newly occupied site.

271 **Non-exhaustive modification possibilities.** A customizable *dispersal* function enables the  
272 modelling of different dispersal kernels depending on the type of organism considered.  
273 Dispersal values can be further linked with: the *ecology* function, for instance trade-off with  
274 other traits [76], e.g. dispersal versus competitive ability [77]; and the *evolution* function  
275 allowing dispersal to evolve, resulting in species with different dispersal abilities [78].

### 276 Evolution

277 **Core.** The *evolution* function determines the change in the traits of each population in  
278 occupied sites of each species. Traits are defined in the configuration object and can evolve  
279 over time for each species' populations. The function iterates over every population of a  
280 species and modifies the trait(s) according to the specified function. Any number of traits,  
281 informed at the configuration object, can evolve (e.g. traits related to dispersal, niche or  
282 competition).

283 **Non-exhaustive modification possibilities.** A customizable *evolution* function takes as input  
284 the species abundance, species trait, species divergence clusters and the landscape values.  
285 In the function it is possible to define which traits evolve and how they change at each time-  
286 step. In particular, the frequency and/or amount of change can be made dependent on  
287 temperature [79], ecological traits [80], or abundances [81], while the directions of change can  
288 follow local optima or various evolutionary models, including Brownian motion [82] and  
289 Ornstein–Uhlenbeck [83].

## gen3sis: engine for eco-evolutionary biodiversity modelling

### 290 Ecology

291 **Core.** The *ecology* function determines the abundance or presence of populations in occupied  
292 sites of each species. Thus, extinction processes derive from *ecology* function interactions  
293 with other processes and landscape dynamics. The function iterates over all occupied sites  
294 and updates the species population abundances or presences on the basis of local  
295 environmental values, updated co-occurrence patterns and species traits.

296 **Non-exhaustive modification possibilities.** A customizable *ecology* function takes as input  
297 the species abundance, species trait, species divergence and clusters, and the landscape  
298 values. Inspired by classic niche theory [10, 15, 84], the function can account for various niche  
299 mechanisms, from simple environmental limits to complex multi-species interactions. It is  
300 possible, for example, to include a carrying capacity for the total number of individuals or  
301 species [21] or competition between species based on phylogenetic or trait distances [26],  
302 based on an interaction currency [85], or further constrained by a functional trade-off [76].

303

## gen3sis: engine for eco-evolutionary biodiversity modelling

### 304 *Outputs and comparisons with empirical data*

305 The computer model delivers a wide range of outputs that can be compared with empirical  
306 data (Figure 1, Table 2). Gen3sis is therefore suitable for analysing the links between  
307 interacting processes and their multidimensional emergent patterns. By recording the time and  
308 origin of all speciation events, as well as trait distributions and abundance throughout  
309 evolutionary history, the simulation model records the information required to track the  
310 dynamics of diversity and the shaping of phylogenetic relationships. The most common  
311 patterns observed and studied by ecologists and evolutionary biologists, including species  
312 ranges, abundances and richness, are emergent properties of the modelled processes (Table  
313 2). All internal objects are accessible to the observer function, which is configurable and  
314 executed during simulation runs. This provides direct simulation outputs in a format ready to  
315 be stored, analysed and compared with empirical data. Given the flexibility of gen3sis, it is  
316 possible to explore not only parameter ranges guided by prior knowledge available for a given  
317 taxonomic group, but also variations in landscape scenarios and mechanisms (Figure 3).  
318 Furthermore, validating modelled outputs with multiple empirical patterns is recommended  
319 [20, 23, 35]. Gen3sis generates multiple outputs, which can be compared with empirical data  
320 using simulation rankings or acceptance criteria [23, 35, 86].

321

322



gen3sis: engine for eco-evolutionary biodiversity modelling

323 **Table 2.** List of outputs from the gen3sis computer model, both direct and indirect, that can be  
 324 compared with empirical data. Direct outputs are the species abundance matrix, species trait  
 325 matrix and phylogeny, while indirect outputs result from various combinations of the direct  
 326 outputs. The computations of indirect outputs rely on other packages available in the R  
 327 environment [65].

| Pattern                                                        |                                                                                                                                                                                                                                                                                                                         | Scale   |          |        |          |      |           |
|----------------------------------------------------------------|-------------------------------------------------------------------------------------------------------------------------------------------------------------------------------------------------------------------------------------------------------------------------------------------------------------------------|---------|----------|--------|----------|------|-----------|
|                                                                |                                                                                                                                                                                                                                                                                                                         | Spatial |          |        | Temporal |      |           |
| Metric                                                         | Example                                                                                                                                                                                                                                                                                                                 | -       |          | +      | -        |      | +         |
|                                                                |                                                                                                                                                                                                                                                                                                                         | local   | regional | global | present  | past | deep past |
| Alpha diversity ( $\alpha$ )                                   | Local species richness follows marked spatial gradients, such as along latitude (LDG, Ricklefs in [87]). Species richness is further correlated across scales when the regional species pool size is positively associated with local species richness [e.g. 4, 88].                                                    | *       | *        | *      | *        | *    | *         |
| Beta diversity ( $\beta$ )                                     | Species turnover is marked along both spatial and environmental gradients [89, 90] and can display sharp boundaries forming biogeographic domains [91].                                                                                                                                                                 |         | *        | *      | *        | *    | *         |
| Gamma diversity ( $\gamma$ )                                   | Regional difference in species richness, for instance across biogeographic regions with comparable climates, such as the continental temperate region of North America versus Asia [92].                                                                                                                                |         |          | *      | *        | *    | *         |
| Species abundance, frequency and range                         | Assemblages are generally composed of a few very abundant species and many rare species [93, 94]. A few species tend to occupy many sites, while most are very rare and have a restricted range size [95].                                                                                                              | *       | *        | *      | *        | *    | *         |
| Species ecological niche width distribution                    | Niche width is heterogeneous across species [96, 97], and narrow niche width leads to higher speciation [98].                                                                                                                                                                                                           | *       | *        | *      | *        | *    | *         |
| Trait evolutionary rates                                       | Ecological traits and niches generally evolve slowly so that closely related lineages have similar traits and niches, coined as niche conservatism [58].                                                                                                                                                                | *       | *        | *      | *        | *    | *         |
| Species diversification rates                                  | Species diversification rate varies over time and across clades [99-101].                                                                                                                                                                                                                                               | *       | *        | *      |          | *    | *         |
| Topological and temporal phylogenetic properties               | Empirical phylogenetic trees typically display a topological signature [102] and have more divided branching over time, with marked prevalence of a recent branching distribution [103].                                                                                                                                | *       | *        | *      |          | *    | *         |
| Phylogenetic alpha ( $\alpha$ ) and beta ( $\beta$ ) diversity | Local communities can show either phylogenetic overdispersion or clustering compared with the regional pool [104]; greater geographic distances correspond to increased phylogenetic $\beta$ diversity across biogeographic barriers [105]; decay in phylogenetic similarity with increasing geographic distance [106]. | *       | *        | *      |          | *    | *         |
| Functional alpha ( $\alpha$ ) and beta ( $\beta$ ) diversity   | Local assemblages represent a subset of the regional functional diversity; functional traits show a typical turnover spatially, often along environmental gradients [107].                                                                                                                                              | *       | *        | *      | *        | *    | *         |

328

## 329 **Case study: The emergence of the LDG from** 330 **environmental changes of the Cenozoic.**

### 331 *Context*

332 The LDG is one of Earth's most iconic biodiversity patterns, but the underlying mechanisms  
333 remain largely debated [20, 61, 62, 97, 98, 108-110]. Many hypotheses have been proposed  
334 to explain the formation of the LDG [20], and these generally agree that a combination of  
335 biological processes and landscape dynamics has shaped the emergence of the LDG [20].  
336 Hypotheses can be generally grouped into three categories [20]: (i) *time for species*  
337 *accumulation*, (ii) variation in *diversification rates*, and (iii) variation in *ecological limits* [Table  
338 1 in 20].

339 Tropical environments can be used to exemplify these three hypothesis categories: First, the  
340 times for species accumulation propose that since tropical environments are older, they should  
341 have more time for species accumulation, without assuming further specific ecological or  
342 evolutionary mechanisms [57-60]. Second, higher temperatures in the tropics increase  
343 metabolic and mutation rates, which could lead to faster reproductive incompatibilities among  
344 populations and higher speciation rates compared with colder environments [61, 62]. Third,  
345 the tropics are generally more productive than colder environments and greater resource  
346 availability can sustain higher abundances, and therefore a larger number of species can  
347 coexist there [63, 64, 111, 112].

348 We implemented one model for each of these hypotheses and simulated the spread,  
349 speciation, dispersal and extinction of terrestrial organisms over the Cenozoic. We evaluated  
350 whether the emerging patterns from these simulated mechanisms correspond to the empirical  
351 LDG, phylogenetic tree imbalance and range size frequencies computed from data of major  
352 tetrapod groups, including mammals, birds, amphibians and reptiles (Figure 3).

353

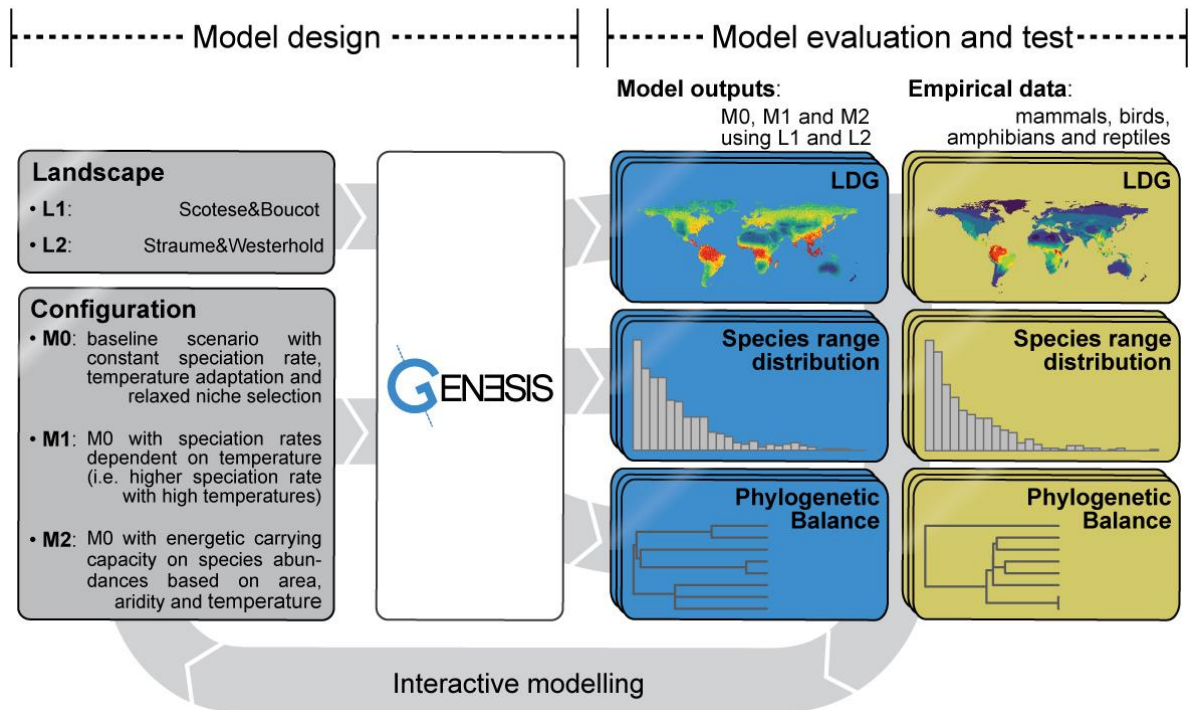

354

355 **Figure 3.** Schematic representation of the case study showing the model design with two  
 356 landscapes (i.e. L1 and L2) and configurations of three models (i.e. M0, M1 and M2) (Table  
 357 S1), and model evaluation and test, based on multiple patterns including: LDG, range size  
 358 distributions and phylogenetic balance. Selection criteria were based on empirical data from  
 359 major tetrapod groups, i.e. mammals, birds, amphibians and reptiles (Table 3).

### 360 *Input landscapes*

361 The Cenozoic (i.e. 65 Ma until the present) is considered key for the diversification of the  
 362 current biota [113] and is the period during which the modern LDG is expected to have been  
 363 formed [114]. In the Cenozoic, the continents assumed their modern geographic configuration  
 364 [24]. Climatically, this period was characterized by a general cooling, especially in the  
 365 Miocene, and ended with the climatic oscillations of the Quaternary [115]. We compiled two  
 366 global paleoenvironmental landscapes (i.e. L1 and L2) for the Cenozoic at 1° and ~170 kyr of  
 367 spatial and temporal resolution, respectively (Note S1, Animations S1 and S2). To account for  
 368 uncertainties on paleo-reconstructions on the emerging large-scale biodiversity patterns, we

## gen3sis: engine for eco-evolutionary biodiversity modelling

369 used two paleo-elevation reconstructions [116, 117] associated with two approaches to  
370 estimate the paleo-temperature of sites (Note S1). L1 had temperatures defined by Köppen  
371 bands based on the geographic distribution of lithologic indicators of climate [54]. L2 had  
372 temperature defined by a composite of benthic foraminifer isotope records over time [118] and  
373 along latitude for specific time periods [119-125]. An aridity index ranging from zero to one  
374 was computed based on the subtropical arid Köppen zone for both landscapes [54]. For details  
375 see Note S1.

### 376 *Hypothesis implementation*

377 We implemented three hypotheses explaining the emergence of the LDG as different gen3sis  
378 models. The models (i.e. M0, M1 and M2) had distinct speciation and ecological processes  
379 (Figure 3, Note S1, Table S1). All simulations were initiated with one single ancestor species  
380 spread over the entire terrestrial surface of the Earth at 65 Ma, where the temperature optimum  
381 of each population matched local site conditions. Since we focused on terrestrial organisms,  
382 aquatic sites were considered inhabitable and twice as difficult to cross as terrestrial sites.  
383 This approximates the different dispersal limitation imposed by aquatic and terrestrial sites.  
384 The spherical shape of the Earth was accounted for in distance calculations by using  
385 haversine geodesic distances. Species disperse following a Weibull distribution with shape 2  
386 or 5 and a scale of 550, 650, 750 or 850, resulting in most values being around 500–1500 km,  
387 with rare large dispersal events above 2000 km. The *evolution* function defines the  
388 temperature niche optimum to evolve following Brownian motion. Temperature niche optima  
389 are homogenized per geographic cluster by an abundance-weighted mean after ecological  
390 processes happen. We explored three rates of niche evolution, with a standard deviation  
391 equivalent to  $\pm 0.1^\circ\text{C}$ ,  $\pm 0.5^\circ\text{C}$  and  $\pm 1^\circ\text{C}$ .

392

gen3sis: engine for eco-evolutionary biodiversity modelling

393 **M0.** In the implementation of the *time for species accumulation*, the *ecology* function defines  
394 the species population abundance, where the abundance increases proportionally to the  
395 distance between the population temperature niche optimum and the site temperature (Note  
396 S1). Clusters of populations that accumulated differentiation over  $\tau = 12, 24, 36, 48$  and  $60$  will  
397 speciate, corresponding to events occurring after 2, 4, 6, 8 and 10 myr of isolation,  
398 respectively. The divergence rate between isolated clusters was kept constant (i.e. +1 for  
399 every 170 kyr of isolation). Model M0, assuming *time for species accumulation*, acted as a  
400 baseline model. This means that all mechanisms present in this model were the same for M1  
401 and M2 if not specified otherwise.

402 **M1.** In the implementation of the *diversification rates*, the speciation function applies a  
403 temperature-dependent divergence between population clusters [61, 62]. Species in warmer  
404 environments accumulate divergence between disconnected clusters of populations at a  
405 higher rate (Note S1). The rate of differentiation increase was the average site temperature of  
406 the species clusters to the power of 2, 4 or 6 plus a constant. This created a differentiation  
407 increase of +1.5 for isolated clusters of a species at the warmest range and +0.5 at the coldest  
408 range for every 170 kyr of isolation (Note S1, Figure S1). Using  $\tau = 12, 24, 36, 48$  and  $60$ , this  
409 corresponds to a speciation event after 1.3, 2.7, 4.0, 5.3, 6.7 myr and after 4, 8, 12, 16, 20  
410 myr for the warmest and coldest species, respectively.

411 **M2.** In the implementation of the *ecological limits*, the *ecology* function includes a carrying  
412 capacity  $k$  of each site that scales with area energy and aridity in the ecology function [112,  
413 126]. The theory of carrying capacity proposes that energy limits abundances and therefore  
414 determines how many of each species can coexist in a given place [21, 112]. If the sum of all  
415 species abundances in a site is above  $k$ , species abundances are randomly reduced across  
416 species until  $k$  is reached. We explored low and high  $k$  values using a  $k$  power-law scaling of  
417 2 and 3.

## 418 *Exploration of model parameters*

419 For each model (i.e. M0, M1 and M2) in combination with each landscape (i.e. L1 and L2), we  
420 explored a range of conservative model parameters in an interactive modelling cycle (Figure  
421 3). In addition, we explored dispersal distributions and parameters ranging in realized mean  
422 and 95% quantiles between less than a single cell, i.e. ~50 km for a landscape at 4°, and more  
423 than the Earth's diameter, i.e. ~12'742 km (Figure S2). Trait evolution frequency and intensity  
424 ranged from zero to one. We ran a full factorial exploration of these parameter ranges at a  
425 coarse resolution of 4° (i.e. M0 n=480, M1 n=720, M2 n=480) and compared these to empirical  
426 data. Simulations considered further: (i) had at least one speciation event; (ii) did not have all  
427 species becoming extinct; (iii) had fewer than 50'000 species; or (iv) had fewer than 10'000  
428 species cohabiting the same site at any point in time (Note S1). After parameter range  
429 exploration, we identified realistic parameters and ran a subset at 1° for high-resolution outputs  
430 (Figure 4).

## 431 *Correspondence with empirical data*

432 In order to explore the parameters of all three models and compare their ability to produce the  
433 observed biodiversity patterns, we used a pattern-oriented modelling (POM) approach [23,  
434 86]. POM compares the predictions of each model and parameter combination with a number  
435 of diagnostic patterns from empirical observations. In our case, we used the LDG slope, tree  
436 imbalance and range size frequencies as diagnostics patterns (Figure 3, Note S1). The POM  
437 approach allows a calibration and model comparison based on high-level diagnostic patterns,  
438 avoiding the hurdles of defining explicit (approximate) likelihood functions [127]. The POM  
439 approach requires the specification of a range for each pattern under which observation and  
440 prediction are accepted, hence when a simulation satisfactorily reproduces empirical  
441 observations. Unless POM is coupled with an explicit probabilistic model [127], the limits for

## gen3sis: engine for eco-evolutionary biodiversity modelling

442 acceptance must be decided by the modeller based on their understanding of the data [23,  
443 86].

444 To generate the empirical values for these patterns, we obtained distribution data on 25'941  
445 species [128-130], following [131], and phylogenetic data on 18'978 species [5, 132-135],  
446 following [136] for major tetrapod groups, i.e. terrestrial mammals, birds, amphibians and  
447 reptiles (Note S1). LDG is given by the percentage of species loss per latitudinal degree and  
448 measured by the slope of a linear regression on normalized species richness against absolute  
449 latitude.  $\beta$ -statistics [31] was used for phylogenetic tree imbalance in ultrametric trees, following  
450 [102]. Species ranges decrease (SRD) in km<sup>2</sup> is given by the percentage of species loss per  
451 species range and is measured by the slope of a linear regression of range size distributions.  
452 Empirical values of LDG,  $\beta$  and SRD were: mammals (LDG=5.1%,  $\beta$ =-0.4, SRD=2.3\*10<sup>3</sup>%),  
453 birds (LDG=1.5%,  $\beta$ =-1.3, SRD=6.5\*10<sup>7</sup>%), amphibians (LDG=3.9%,  $\beta$ =-0.7, SRD=0.11%)  
454 and reptiles (LDG=1.5%,  $\beta$ =-0.8, SRD=5.3\*10<sup>3</sup>%). Based on these values, we used the  
455 following acceptance criteria: (i) LDG between 5.4% and 1.1%, (ii) tree shape statistic  $\beta$   
456 between -1.4 and -0.3, and (iii) range size frequencies with a decrease in the number of large-  
457 range species with a tolerance of 5% [93-95] (Note S1).

### 458 *Simulations results and synthesis*

459 We found that model M2 was the best match for all the empirical patterns individually, and the  
460 only model able to pass all acceptance criteria (Table 3). Although all three models were able  
461 to reproduce the LDG, M2 was superior in explaining the LDG, phylogenetic tree imbalance  
462 and species range size frequencies simultaneously (Table 3). Most simulations of model M2  
463 (67%) resulted in a decrease in species richness at higher latitudes, indicating that the LDG  
464 emerged systematically under M2 mechanisms (Figure S3, Tables S2, S3 and S4). Increasing  
465 the spatial resolution of the simulations (n=12) resulted in an increase in  $\gamma$  richness and  
466 computation time and a slight decrease of the LDG (Figure S5), which was associated with a

## gen3sis: engine for eco-evolutionary biodiversity modelling

467 disproportionately larger number of sites towards higher latitudes, which also affects population  
468 connectivity and therefore speciation rates [137]. We then selected the best matching  
469 simulation of M2 in L1 at 1° (n=12) that predicted realistic biodiversity patterns (Figure 4,  
470 Animation S4), The emerging LDG (i.e. 4.6% of species loss per latitudinal degree) closely  
471 matched empirical curves, with good agreement for mammals (Pearson  $r=0.6$ ), birds ( $r=0.57$ ),  
472 amphibians ( $r=0.57$ ) and reptiles ( $r=0.38$ ) (Note S1, Figure 4C, Figure S6). Finally, we found  
473 that the support for M2 over M0 and M1 was consistent across the two alternative landscapes  
474 L1 and L2 (Figure S3, Table S4).

475 Our sensitivity analyses of parameters further provided information about the role of dispersal  
476 and ecological processes in shaping the LDG (Note S1, Table S2 and S3). In particular, our  
477 results indicate that an increase in the scaling factor of carrying capacity with energy  $k$  resulted  
478 in a steeper LDG slope, which is in agreement with findings from previous studies [21, 61,  
479 112, 126]. Similarly, increasing the time for divergence consistently led to lower species  
480 richness and flattened the LDG slope so that the tropics accumulated diversity more slowly,  
481 but changes in speciation rates were less likely to drive large-scale biodiversity patterns [110].  
482 Saupe and colleagues [25] showed that simulations with poor dispersal are better at  
483 representing the observed strong LDG in tetrapods. In agreement with their results, our  
484 parameter explorations indicated that dispersal correlated negatively with LDG [25], and  
485 simulations with lower dispersal parameters agreed better with the data (Note S1). While  
486 previous case studies [25, 26, 44] have been carried out to investigate the formation of the  
487 LDG using computer models, they used a shorter timeframe (i.e. below 1 Ma) and/or explored  
488 few mechanisms, i.e. simplified landscape or single acceptance criteria [24, 41, 42, 110].  
489 Beyond this illustrative case study, future analyses could combine multiple mechanisms in  
490 relation to additional biodiversity patterns in order to investigate the most likely combination of  
491 mechanisms shaping the intriguing LDG pattern.

492



gen3sis: engine for eco-evolutionary biodiversity modelling

**A Landscape (L1)**

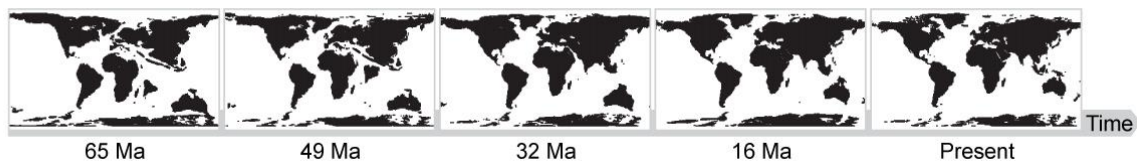

**B Emerging patterns (Simulation M2 in L1)**

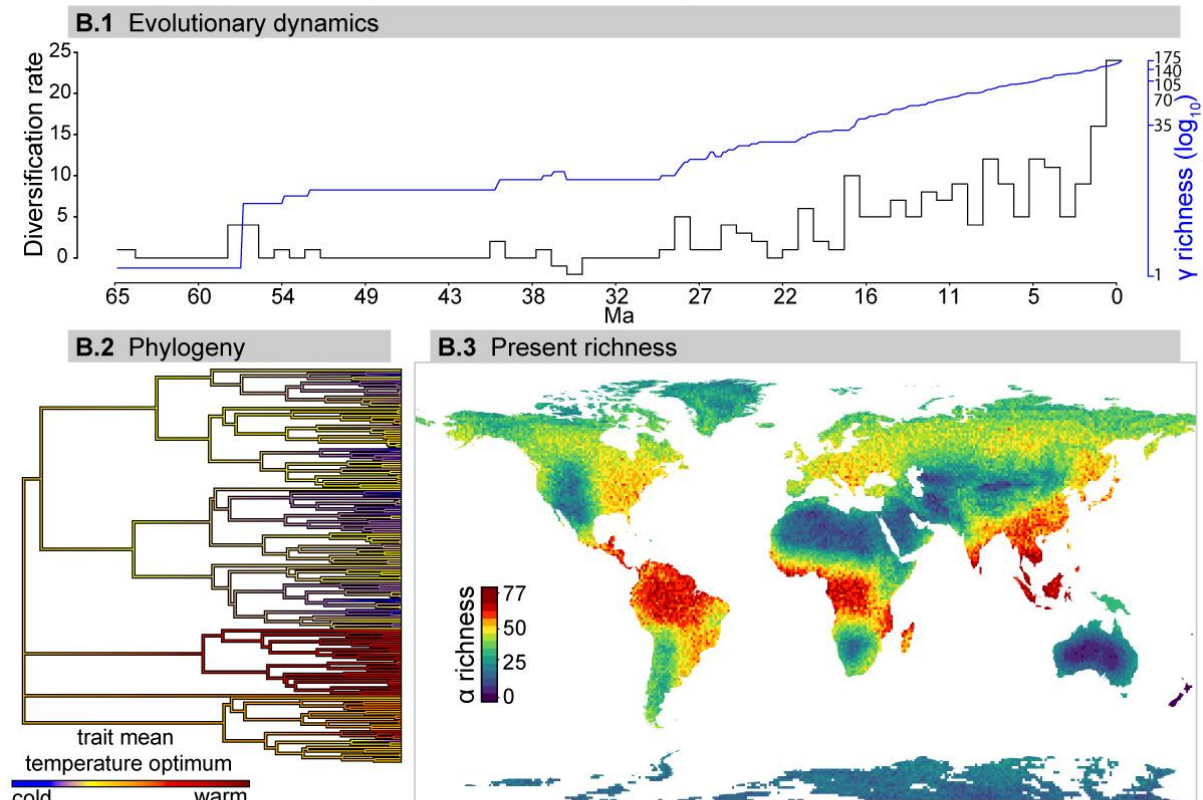

**C Correspondence with empirical data (LDG)**

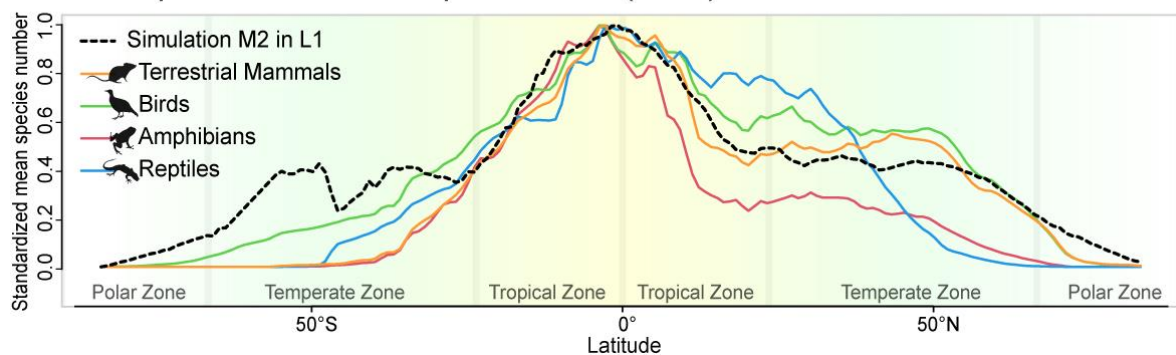

493

494 **Figure 4.** Illustration of one global simulation of the speciation, dispersal and extinction of

495 lineages over the Cenozoic, starting with a single ancestor species and imposed energetic

496 carrying capacity (M2 in L1). (A) Images of the Earth land masses through time, used as input

497 for the simulation. (B) Selected emerging patterns: evolutionary dynamics; phylogeny; and

498 present richness. (B.1) Evolutionary dynamics:  $\gamma$  richness ( $\log_{10}$  scale) through time (blue line)

gen3sis: engine for eco-evolutionary biodiversity modelling

499 *and diversification rate. (B.2) Phylogeny showing the distribution of the temperature optima*  
 500 *for all extant species. (B.3) Present distribution of simulated  $\alpha$  biodiversity globally, which*  
 501 *indicates locations of biodiversity hotspots. For the empirical match see Figure S3. (C) Model*  
 502 *correspondence with empirical data of terrestrial mammals, birds, amphibians and reptiles for*  
 503 *the LDG, measured as the standardized and area-scaled mean species number per latitudinal*  
 504 *degree.*

505 **Table 3.** Model acceptance table with pattern descriptions and details of acceptance derived  
 506 from empirical data. Percentages of accepted simulations (for both landscapes) are shown for  
 507 each model and acceptance parameter and the combination of all acceptance patterns.

| Acceptance                  |                                                                                                                                                                                             | M0      | M1      | M2      |
|-----------------------------|---------------------------------------------------------------------------------------------------------------------------------------------------------------------------------------------|---------|---------|---------|
| Pattern                     | Description and empirical acceptance                                                                                                                                                        | (n=480) | (n=720) | (n=480) |
| <b>LDG</b>                  | Percentage of species loss per latitudinal degree from linear regression slope.<br>Accept LDGs between 5% and 1%                                                                            | 34%     | 36%     | 42%     |
| <b>Phylogenetic balance</b> | The imbalance of a phylogenetic tree is measured by the value that maximizes the likelihood in the $\beta$ -splitting model [138].<br>Accept phylogenies with $\beta$ between -1.4 and -0.3 | 58%     | 51%     | 66%     |
| <b>Range</b>                | Range size distributions.<br>Accept only distributions that show a consistent frequency decrease towards large-ranged species with a tolerance of 5%                                        | 0%      | 0%      | 5%      |
| <b>Combined</b>             | Simulations passing all criteria above with at least 100 species alive at the present.                                                                                                      | 0%      | 0%      | 1%      |

508

## 509 Discussion

510 Understanding the emergence of biodiversity patterns requires the consideration of multiple  
511 biological processes and abiotic forces that potentially underpin them [20, 26, 35, 36]. We  
512 have introduced gen3sis, a modular, spatially-explicit, eco-evolutionary simulation engine  
513 implemented as an R-package, which offers the possibility to explore ecological and  
514 macroevolutionary dynamics over changing landscapes. Gen3sis generates commonly  
515 observed diversity patterns and, thanks to its flexibility, enables the testing of a broad range  
516 of hypotheses (Table 4). It follows the principle of computer models from other fields [139-  
517 141], where mechanisms are implemented in a controlled numeric environment and emerging  
518 patterns can be compared with empirical data [23]. The combination of exploring patterns  
519 emerging from models and matching qualitatively and quantitatively the model outputs to  
520 empirical data should increase our understanding of the processes underlying global  
521 biodiversity patterns.

522 Using a case study, we have illustrated the flexibility and utility of gen3sis in modelling multiple  
523 eco-evolutionary hypotheses in global paleo-environmental reconstructions (Figures 3 and 4).  
524 Our findings suggest that global biodiversity patterns can be modelled realistically by  
525 combining paleo-environmental reconstructions with eco-evolutionary processes, thus moving  
526 beyond pattern description to pattern reproduction [35]. Nevertheless, in our case study we  
527 only implemented a few of the standing LDG hypotheses [20, 34]. Multiple macroecological  
528 and macroevolutionary hypotheses still have to be tested, including the role of stronger biotic  
529 interactions in the tropics than in other regions [142], and compared with more biodiversity  
530 patterns [20]. Considering multiple additional biodiversity patterns will allow a more robust  
531 selection of models. Apart from the global LDG case study, we propose an additional case  
532 study (Note S2, Figure S7) illustrating how gen3sis can be used for regional and theoretical  
533 studies, such as investigations of the effect of island ontology on the temporal dynamics of  
534 biodiversity [39, 143]. Further, illustrations associated with the programming code are offered

## gen3sis: engine for eco-evolutionary biodiversity modelling

535 as a vignette of the R-package, which will support broad application of gen3sis. Altogether,  
536 our examples illustrate the great potential for exploration provided by gen3sis, promising future  
537 advances in our understanding of empirical biodiversity patterns.

538 Verbal explanations of the main principles underlying the emergence of biodiversity are  
539 frequently proposed but are rarely quantified or readily generalized across study systems [20].  
540 We anticipate that gen3sis will be particularly useful for exploring the consequences of  
541 mechanisms that so far have mostly been verbally defined. For example, the origins of  
542 biodiversity gradients have been associated with a variety of mechanisms [7], but these  
543 represent verbal abstractions of biological processes that are difficult to evaluate [20].  
544 Whereas simulation models can always be improved, their formulation implies formalizing  
545 process-based abstractions via mechanisms expected to shape the emergent properties of a  
546 system [144]. Specifically, when conveying models with gen3sis, decisions regarding the  
547 biological processes and landscapes must be formalized in a reproducible fashion. By  
548 introducing gen3sis, we encourage a standardization of configuration and landscape objects,  
549 which will facilitate future model comparisons. This standardization offers a robust framework  
550 for developing, testing, comparing, and applying the mechanisms relevant to biodiversity  
551 research.

552 Studying multiple patterns is a promising approach in disentangling competing hypotheses  
553 [20, 86]. A wide range of biodiversity dimensions can be simulated with gen3sis (Table 2),  
554 which – after appropriate sampling [145] – can serve in a multi-dimensional comparison with  
555 empirical data, i.e. a time series of species abundance matrices and trait matrices, as well as  
556 a phylogeny. These output objects are compatible with most R-packages used for community  
557 or phylogenetic analyses. Hence, the model outputs can be linked to packages computing  
558 diversification rates [146], community phylogenetics [147], or functional diversity [148]. The  
559 comparison of simulation outputs with empirical data requires a systematic exploration of  
560 processes, when formulating models, and parameter values [e.g. 149]. First, a set of  
561 mechanisms and/or a range of reasonable parameter values are explored, for instance

## gen3sis: engine for eco-evolutionary biodiversity modelling

562 dispersal distances from measurements in a specific clade [150] and/or evolutionary rates  
563 [151]. A range of simulation outputs can then be evaluated quantitatively by studying the range  
564 of models and parameter values that produce the highest level of agreement with multiple  
565 types of empirical data, using for example a pattern-oriented modelling approach [86]. For  
566 each model, patterns are evaluated given an acceptance criteria [e.g. 40]. A multi-scale and  
567 multi-pattern comparison of simulations with empirical data can be completed to evaluate a  
568 model's ability to simultaneously reproduce not only one, but a diverse set of empirical patterns  
569 across multiple biodiversity dimensions.

570 The quality of the outputs of simulation models such as gen3sis hinges on accurate  
571 reconstructions of past environmental conditions [3, 42]. Although recent studies using realistic  
572 landscapes and computer models reproduced biodiversity patterns over a time scale spanning  
573 the Quaternary [25, 26, 44], many speciation and extinction events shaping present diversity  
574 patterns date back before the glaciation, and few studies have covered deep-time dynamics  
575 [24, 41, 42, 131]. Deep-time landscape reconstructions are still generally lacking but are  
576 increasingly becoming available [116, 118]. Here, we used available paleo-elevation models  
577 [116, 117] and paleoclimate indicators [54, 118-125, 152-154] to generate input landscapes  
578 to explore the formation of the LDG and account for uncertainties and limitations. For instance,  
579 we represented Quaternary climatic oscillation using ~170 kyr time-steps, which correspond  
580 to a coarser temporal scale compared with the frequency of oscillations, and thus do not  
581 account for shorter climatic variation effects on diversity patterns [25, 26, 44]. We also did not  
582 consider ice cover, that can mask species' habitable sites, which probably explains the the  
583 mismatch between simulated and empirical LDG patterns below 50° (Figure 4C). Moreover,  
584 paleo indicators of climate from Köppen bands have major limitations, and the temperature  
585 estimation derived in our case study can suffer from large inaccuracies. Lastly, extrapolation  
586 of the current temperature lapse rate along elevation might lead to erroneous estimates,  
587 especially in terms of the interaction with air moisture [155], which was not further investigated  
588 here. Hence, the presented case study represents a preliminary attempt for illustrative

gen3sis: engine for eco-evolutionary biodiversity modelling

589 purposes. Further research is required to generate more accurate paleolandscapes, and  
 590 research in biology should improve empirical evidence and our understanding of mechanisms.  
 591 We expect that gen3sis will support exciting interdisciplinary research across the fields of  
 592 geology, climatology and biology to understand the shaping of biodiversity.

593 **Table 4.** A non-exhaustive list of expected applications of gen3sis. Given the flexibility and the  
 594 range of outputs produced by the engine, we expect that gen3sis will serve a large range of  
 595 purposes, from testing a variety of theories and hypotheses to evaluating phylogenetic  
 596 diversification methods.

| Use                                                                                                                                                                                                | Examples from Figure 1                                                                                                          |
|----------------------------------------------------------------------------------------------------------------------------------------------------------------------------------------------------|---------------------------------------------------------------------------------------------------------------------------------|
| Testing phylogenetic inference methods, including diversification rates in phylogeographic reconstructions.                                                                                        | Infer diversification rate in gen3sis simulated phylogenies (E) and compare with a known diversification in gen3sis (A, B & G). |
| Providing biotic scenarios for past responses to geodynamics.                                                                                                                                      | Based on model outputs (C–F) and comparisons with empirical data (H), select plausible models (B).                              |
| Testing paleo-climatic and paleo-topographic reconstructions using biodiversity data.                                                                                                              | Based on model outputs (C–F) and comparisons with empirical data (H), select plausible landscape(s) (A).                        |
| Comparing expectations of different processes relating to the origin of biodiversity; generating and testing hypotheses.                                                                           | Compare models (A, B & G) with outputs (C–F) and possibly how well outputs match empirical data (H).                            |
| Comparing simulated intra-specific population structure with empirical genetic data.                                                                                                               | Compare simulated divergence matrices with population genetic data.                                                             |
| Forecasting the response of biodiversity to global changes (e.g. climate or fragmentation).                                                                                                        | Extrapolate plausible and validated models (A, B & G) on landscapes under climate change scenarios (A).                         |
| Investigating trait evolution through space and time.                                                                                                                                              | Combine past and present simulated species traits (F) and distributions (C, D) with fossil and trait data (H).                  |
| Modelling complex systems in space and time in unconventional biological contexts in order to investigate eco-evolutionary processes in fields traditionally not relying on biological principles. | Model eco-evolutionary mechanisms (A, B & G) in an unconventional eco-evolutionary context.                                     |

597

## 598 **Conclusions**

599 Here we have introduced gen3sis, a modular simulation engine that enables exploration of the  
600 consequences of ecological and evolutionary processes and feedbacks on the emergence of  
601 spatio-temporal macro-eco-evolutionary biodiversity dynamics. This modelling approach  
602 bears similarity with other computer models that have led to significant progress in other fields,  
603 such as climatology [139], cosmology [140] and conservation [141]. We showcase the  
604 versatility and utility of gen3sis by comparing the ability of three alternative mechanisms in two  
605 landscapes to generate the LDG while accounting for other global biodiversity patterns.  
606 Besides the LDG, frontiers on the origins of biodiversity involve [16]: (i) quantifying speciation,  
607 extinction and dispersal events [114]; (ii) exploring adaptive niche evolution [26, 44]; and (iii)  
608 investigating multiple diversity-dependence and carrying capacity mechanisms [21, 111, 112].  
609 Further exploration possibilities may include: (iv) revealing the mechanisms behind age-  
610 dependent speciation and extinction patterns [102, 108, 156]; (v) contrasts between terrestrial  
611 and aquatic ecosystems [16]; and (vi) calculations of uncertainty resulting from climatic and  
612 geological dynamics [e.g. 24, 25, 26, 41, 42]. Gen3sis can support these research frontiers as  
613 a general tool for formalizing and studying existing theories associated with the origin of  
614 biodiversity, testing new hypotheses against data, and making predictions about future  
615 biodiversity trajectories (Table 4). Openly available as an R-package, gen3sis has the potential  
616 to catalyse interdisciplinary biodiversity research. We call for the formation of a community of  
617 ecologists, biologists, mathematicians, geologists, climatologists and scientists from other  
618 fields around this class of eco-evolutionary simulation models in order to unravel the  
619 processes that have shaped Earth's biodiversity.

## 620 **Availability**

621 Gen3sis is implemented in a mix of R and C++ code, and wrapped into an R-package. All  
622 high-level functions that the user may interact with are written in R, and are documented via  
623 the standard R / Roxygen help files for R-packages. Runtime-critical functions are  
624 implemented in C++ and coupled to R via the Rcpp framework. Additionally, the package  
625 provides several convenience functions to generate input data, configuration files and plots,  
626 as well as tutorials in the form of vignettes that illustrate how to declare models and run  
627 simulations. The software, under an open and free GPL3 license, can be downloaded from  
628 CRAN at <https://CRAN.R-project.org/package=gen3sis>. The development version, open to  
629 issue reporting and feature suggestions, is available at [https://github.com/project-Gen3sis/R-](https://github.com/project-Gen3sis/R-package)  
630 [package](https://github.com/project-Gen3sis/R-package). Supporting information, such as notes, scripts, data, figures and animations, are  
631 available at <https://github.com/ohagen/SupplementaryInformationGen3sis>, facilitating full  
632 reproducibility.

## 633 **Acknowledgements**

634 We thank Samuel Bickel and Alex Skeels for thorough comments on this manuscript and  
635 package. We thank Camille Albouy, Charles N.D. Santana, Lydian Boschman, Wilhelmine  
636 Bach, Thomas Keggin, Flurin Leugger, Victor L.J. Boussange, Conor Waldock and all sELDiG  
637 working group participants for insightful feedback during the model development. We thank  
638 the WSL and ETH Zürich for support and infrastructure including access to High Performance  
639 Computing facilities.



## 640 References

- 641 1. Darwin C. On the origin of species by means of natural selection, or preservation  
642 of favoured races in the struggle for life. London: John Murray; 1859.
- 643 2. Couvreur TLP, Dauby G, Blach-Overgaard A, Deblauwe V, Dessein S, Droissart V,  
644 et al. Tectonics, climate and the diversification of the tropical African terrestrial flora  
645 and fauna. *Biological Reviews Cambridge Philosophical Society*. 2020. Epub  
646 2020/09/15. doi: 10.1111/brv.12644.
- 647 3. Pellissier L, Heine C, Rosauer DF, Albouy C. Are global hotspots of endemic  
648 richness shaped by plate tectonics? *Biol J Linn Soc*. 2017;123(1):247-61. doi:  
649 10.1093/biolinnean/blx125.
- 650 4. Gaston KJ. Global patterns in biodiversity. *Nature*. 2000;405(6783):220-7. doi:  
651 10.1038/35012228.
- 652 5. Jetz W, Thomas GH, Joy JB, Hartmann K, Mooers AO. The global diversity of birds  
653 in space and time. *Nature*. 2012;491(7424):444-8. Epub 2012/11/06. doi:  
654 10.1038/nature11631.
- 655 6. Mittelbach GG, Schemske DW, Cornell HV, Allen AP, Brown JM, Bush MB, et al.  
656 Evolution and the latitudinal diversity gradient: speciation, extinction and  
657 biogeography. *Ecol Lett*. 2007;10(4):315-31. doi: 10.1111/j.1461-0248.2007.01020.x.
- 658 7. Fine PVA. Ecological and evolutionary drivers of geographic variation in species  
659 diversity. *Annual Review of Ecology, Evolution, and Systematics*. 2015;46(1):369-92.  
660 doi: 10.1146/annurev-ecolsys-112414-054102.
- 661 8. Humboldt Av, Bonpland A. *Ideennzu einer geographie der pflanzen nebst einem*  
662 *naturgemälde der tropenländer, auf beobachtungen und messungen gegründet*.  
663 Tübingen,; F. G. Cotta; etc.; 1807. 2 p.l., xii, 182 p. p.
- 664 9. Wallace AR. *Tropical nature, and other essays*. London: Macmillan and Company;  
665 1878.
- 666 10. Hutchinson GE. Homage to Santa Rosalia or why are there so many kinds of  
667 animals? *The American Naturalist*. 1959;93(870):145-59. doi: 10.1086/282070.
- 668 11. MacArthur R, Wilson E. *The theory of island biogeography*. Princeton, NJ:  
669 Princeton Univ. Press; 1967.
- 670 12. Pianka ER. Convexity, desert lizards, and spatial heterogeneity. *Ecology*.  
671 1966;47(6):1055-9. doi: 10.2307/1935656.
- 672 13. Willig MR, Kaufman DM, Stevens RD. Latitudinal gradients of biodiversity:  
673 Pattern, process, scale, and synthesis. *Annual Review of Ecology, Evolution, and*  
674 *Systematics*. 2003;34(1):273-309. doi: 10.1146/annurev.ecolsys.34.012103.144032.
- 675 14. Schemske DW, Mittelbach GG. "Latitudinal gradients in species diversity":  
676 Reflections on Pianka's 1966 article and a look forward. *The American Naturalist*.  
677 2017;189(6):599-603. Epub 2017/05/18. doi: 10.1086/691719.
- 678 15. MacArthur RH. Patterns of species diversity. *Biological Reviews*. 1965;40(4):510-  
679 33. doi: 10.1111/j.1469-185X.1965.tb00815.x.
- 680 16. Benton MJ. Origins of Biodiversity. *PLoS Biol*. 2016;14(11):e2000724. doi:  
681 10.1371/journal.pbio.2000724.
- 682 17. Morlon H, Parsons TL, Plotkin JB. Reconciling molecular phylogenies with the  
683 fossil record. *Proceedings of the National Academy of Sciences*. 2011;108(39):16327-  
684 32. Epub 2011/09/21. doi: 10.1073/pnas.1102543108.

- 685 18. Field R, Hawkins BA, Cornell HV, Currie DJ, Diniz-Filho JAF, Guégan J-F, et al.  
686 Spatial species-richness gradients across scales: a meta-analysis. *J Biogeogr.*  
687 2009;36(1):132-47. doi: 10.1111/j.1365-2699.2008.01963.x.
- 688 19. Sandel B, Arge L, Dalsgaard B, Davies RG, Gaston KJ, Sutherland WJ, et al. The  
689 influence of Late Quaternary climate-change velocity on species endemism. *Science.*  
690 2011;334(6056):660-4.
- 691 20. Pontarp M, Bunnefeld L, Cabral JS, Etienne RS, Fritz SA, Gillespie R, et al. The  
692 latitudinal diversity gradient: Novel understanding through mechanistic eco-  
693 evolutionary models. *Trends in Ecology and Evolution.* 2019;34(3):211-23. doi:  
694 10.1016/j.tree.2018.11.009.
- 695 21. Etienne RS, Cabral JS, Hagen O, Hartig F, Hurlbert AH, Pellissier L, et al. A minimal  
696 model for the latitudinal diversity gradient suggests a dominant role for ecological  
697 limits. *The American Naturalist.* 2019;194(5):E122-E33. Epub 2019/10/16. doi:  
698 10.1086/705243.
- 699 22. Doebeli M, Dieckmann U. Speciation along environmental gradients. *Nature.*  
700 2003;421(6920):259-64. doi: 10.1038/nature01274.
- 701 23. Grimm V, Revilla E, Berger U, Jeltsch F, Mooij WM, Railsback SF, et al. Pattern-  
702 oriented modeling of agent-based complex systems: Lessons from ecology. *Science.*  
703 2005;310(5750):987-91. doi: 10.1126/science.1116681.
- 704 24. Leprieur F, Descombes P, Gaboriau T, Cowman PF, Parravicini V, Kulbicki M, et al.  
705 Plate tectonics drive tropical reef biodiversity dynamics. *Nature Communications.*  
706 2016;7:11461. doi: 10.1038/ncomms11461.
- 707 25. Saupe EE, Myers CE, Townsend Peterson A, Soberon J, Singarayer J, Valdes P, et  
708 al. Spatio-temporal climate change contributes to latitudinal diversity gradients. *Nature*  
709 *Ecology & Evolution.* 2019;3(10):1419-29. Epub 2019/09/11. doi: 10.1038/s41559-  
710 019-0962-7.
- 711 26. Rangel TF, Edwards NR, Holden PB, Diniz-Filho JAF, Gosling WD, Coelho MTP, et  
712 al. Modeling the ecology and evolution of biodiversity: Biogeographical cradles,  
713 museums, and graves. *Science.* 2018;361(6399):eaar5452. doi:  
714 10.1126/science.aar5452.
- 715 27. Duputie A, Massol F. An empiricist's guide to theoretical predictions on the  
716 evolution of dispersal. *Interface Focus.* 2013;3(6):20130028. Epub 2014/02/12. doi:  
717 10.1098/rsfs.2013.0028.
- 718 28. Keller I, Seehausen O. Thermal adaptation and ecological speciation. *Mol Ecol.*  
719 2012;21(4):782-99. Epub 2011/12/21. doi: 10.1111/j.1365-294X.2011.05397.x.
- 720 29. Urban MC. The evolution of species interactions across natural landscapes. *Ecol*  
721 *Lett.* 2011;14(7):723-32. Epub 2011/05/28. doi: 10.1111/j.1461-0248.2011.01632.x.
- 722 30. Mittelbach GG, Schemske DW. Ecological and evolutionary perspectives on  
723 community assembly. *Trends in Ecology and Evolution.* 2015;30(5):241-7. Epub  
724 2015/03/26. doi: 10.1016/j.tree.2015.02.008.
- 725 31. Schluter D, Pennell MW. Speciation gradients and the distribution of biodiversity.  
726 *Nature.* 2017;546(7656):48-55. doi: 10.1038/nature22897.
- 727 32. Villa Martin P, Hidalgo J, Rubio de Casas R, Munoz MA. Eco-evolutionary Model of  
728 Rapid Phenotypic Diversification in Species-Rich Communities. *PLoS Comp Biol.*  
729 2016;12(10):e1005139. doi: 10.1371/journal.pcbi.1005139.
- 730 33. Leidinger L, Cabral J. Biodiversity dynamics on islands: Explicitly accounting for  
731 causality in mechanistic models. *Diversity.* 2017;9(3). doi: 10.3390/d9030030.

- 732 34. Pontarp M, Wiens JJ. The origin of species richness patterns along environmental  
733 gradients: uniting explanations based on time, diversification rate and carrying capacity.  
734 *J Biogeogr.* 2017;44(4):722-35. doi: 10.1111/jbi.12896.
- 735 35. Gotelli NJ, Anderson MJ, Arita HT, Chao A, Colwell RK, Connolly SR, et al. Patterns  
736 and causes of species richness: a general simulation model for macroecology. *Ecol Lett.*  
737 2009;12(9):873-86. doi: 10.1111/j.1461-0248.2009.01353.x.
- 738 36. Cabral JS, Valente L, Hartig F. Mechanistic simulation models in macroecology  
739 and biogeography: state-of-art and prospects. *Ecography.* 2017;40(2):267-80. doi:  
740 10.1111/ecog.02480.
- 741 37. Connolly SR, Keith SA, Colwell RK, Rahbek C. Process, mechanism, and modeling  
742 in macroecology. *Trends in Ecology and Evolution.* 2017;32(11):835-44. doi:  
743 10.1016/j.tree.2017.08.011.
- 744 38. Skeels A, Cardillo M. Reconstructing the geography of speciation from  
745 contemporary biodiversity data. *The American Naturalist.* 2019;193(2):240-55. Epub  
746 2019/02/06. doi: 10.1086/701125.
- 747 39. Cabral JS, Wiegand K, Kreft H. Interactions between ecological, evolutionary and  
748 environmental processes unveil complex dynamics of insular plant diversity. *J Biogeogr.*  
749 2019. doi: 10.1111/jbi.13606.
- 750 40. Cabral JS, Whittaker RJ, Wiegand K, Kreft H, Emerson B. Assessing predicted  
751 isolation effects from the general dynamic model of island biogeography with an eco-  
752 evolutionary model for plants. *J Biogeogr.* 2019. doi: 10.1111/jbi.13603.
- 753 41. Donati GFA, Parravicini V, Leprieur F, Hagen O, Gaboriau T, Heine C, et al. A  
754 process-based model supports an association between dispersal and the prevalence of  
755 species traits in tropical reef fish assemblages. *Ecography.* 2019;42(12):2095-106. doi:  
756 10.1111/ecog.04537.
- 757 42. Saupe EE, Qiao H, Donnadiou Y, Farnsworth A, Kennedy-Asser AT, Ladant J-B, et  
758 al. Extinction intensity during Ordovician and Cenozoic glaciations explained by cooling  
759 and palaeogeography. *Nature Geoscience.* 2020;13(1):65-70. doi: 10.1038/s41561-019-  
760 0504-6.
- 761 43. Gaboriau T, Albouy C, Descombes P, Mouillot D, Pellissier L, Leprieur F.  
762 Ecological constraints coupled with deep-time habitat dynamics predict the latitudinal  
763 diversity gradient in reef fishes. *Proceedings of the Royal Society B: Biological Sciences.*  
764 2019;286(1911):20191506. Epub 2019/09/19. doi: 10.1098/rspb.2019.1506.
- 765 44. Saupe EE, Myers CE, Peterson AT, Soberón J, Singarayer J, Valdes P, et al. Non-  
766 random latitudinal gradients in range size and niche breadth predicted by spatial  
767 patterns of climate. *Global Ecol Biogeogr.* 2019;28(7):928-42. doi: 10.1111/geb.12904.
- 768 45. Pontarp M, Brännström Å, Petchey OL, Poisot T. Inferring community assembly  
769 processes from macroscopic patterns using dynamic eco-evolutionary models and  
770 Approximate Bayesian Computation (ABC). *Methods in Ecology and Evolution.*  
771 2019;10(4):450-60. doi: 10.1111/2041-210x.13129.
- 772 46. Sukumaran J, Economo EP, Lacey Knowles L. Machine Learning Biogeographic  
773 Processes from Biotic Patterns: A New Trait-Dependent Dispersal and Diversification  
774 Model with Model Choice By Simulation-Trained Discriminant Analysis. *Syst Biol.*  
775 2016;65(3):525-45. Epub 2015/12/31. doi: 10.1093/sysbio/syv121.
- 776 47. Kubisch A, Holt RD, Poethke H-J, Fronhofer EA. Where am I and why?  
777 Synthesizing range biology and the eco-evolutionary dynamics of dispersal. *Oikos.*  
778 2014;123(1):5-22. doi: 10.1111/j.1600-0706.2013.00706.x.

- 779 48. Pigot AL, Phillimore AB, Owens IP, Orme CD. The shape and temporal dynamics  
780 of phylogenetic trees arising from geographic speciation. *Syst Biol*. 2010;59(6):660-73.  
781 Epub 2010/10/19. doi: 10.1093/sysbio/syq058.
- 782 49. Rangel Thiago Fernando LVB, Diniz-Filho José Alexandre F, Colwell Robert K.  
783 Species Richness and Evolutionary Niche Dynamics: A Spatial Pattern-Oriented  
784 Simulation Experiment. *The American Naturalist*. 2007;170(4):602-16. doi:  
785 10.1086/521315.
- 786 50. Rangel TFLVB, Diniz-Filho JAF. An evolutionary tolerance model explaining  
787 spatial patterns in species richness under environmental gradients and geometric  
788 constraints. *Ecography*. 2005;28(2):253-63. doi: 10.1111/j.0906-7590.2005.04038.x.
- 789 51. Culina A, van den Berg I, Evans S, Sanchez-Tojar A. Low availability of code in  
790 ecology: A call for urgent action. *PLoS Biol*. 2020;18(7):e3000763. Epub 2020/07/30.  
791 doi: 10.1371/journal.pbio.3000763.
- 792 52. Muneeppeerakul R, Bertuzzo E, Rinaldo A, Rodriguez-Iturbe I. Evolving  
793 biodiversity patterns in changing river networks. *J Theor Biol*. 2019;462:418-24. Epub  
794 2018/11/30. doi: 10.1016/j.jtbi.2018.11.021.
- 795 53. Jöks M, Pärtel M. Plant diversity in Oceanic archipelagos: realistic patterns  
796 emulated by an agent-based computer simulation. *Ecography*. 2018;42(4):740-54. doi:  
797 10.1111/ecog.03985.
- 798 54. Hagen O, Vaterlaus L, Albouy C, Brown A, Leugger F, Onstein RE, et al. Mountain  
799 building, climate cooling and the richness of cold-adapted plants in the Northern  
800 Hemisphere. *J Biogeogr*. 2019. doi: 10.1111/jbi.13653.
- 801 55. Xu X, Kuntner M, Liu F, Chen J, Li D. Formation of rivers and mountains drives  
802 diversification of primitively segmented spiders in continental East Asia. *J Biogeogr*.  
803 2018. doi: 10.1111/jbi.13403.
- 804 56. Ficetola GF, Mazel F, Thuiller W. Global determinants of zoogeographical  
805 boundaries. *Nature Ecology & Evolution*. 2017;1:0089. doi: 10.1038/s41559-017-0089.
- 806 57. Wiens JJ, Donoghue MJ. Historical biogeography, ecology and species richness.  
807 *Trends in Ecology and Evolution*. 2004;19(12):639-44. doi: 10.1016/j.tree.2004.09.011.
- 808 58. Wiens JJ, Graham CH. Niche conservatism: Integrating evolution, ecology, and  
809 conservation biology. *Annual Review of Ecology, Evolution, and Systematics*.  
810 2005;36(1):519-39. doi: 10.1146/annurev.ecolsys.36.102803.095431.
- 811 59. Fischer AG. Latitudinal Variations in Organic Diversity. *Evolution*.  
812 1960;14(1):64-81. doi: 10.2307/2405923.
- 813 60. Patrick R. Stephens, John J. Wiens. Explaining Species Richness from Continents  
814 to Communities: The Time-for-Speciation Effect in Emydid Turtles. *The American*  
815 *Naturalist*. 2003;161(1):112-28. doi: 10.1086/345091.
- 816 61. Allen AP, Gillooly JF, Savage VM, Brown JH. Kinetic effects of temperature on  
817 rates of genetic divergence and speciation. *Proceedings of the National Academy of*  
818 *Sciences*. 2006;103(24):9130-5. doi: 10.1073/pnas.0603587103.
- 819 62. Rohde K. Latitudinal gradients in species diversity: the search for the primary  
820 cause. *Oikos*. 1992:514-27.
- 821 63. MacArthur RH, Wilson EO. An Equilibrium Theory of Insular Zoogeography.  
822 *Evolution*. 1963;17(4):373-87. doi: 10.2307/2407089.
- 823 64. Rosenzweig ML. Species diversity in space and time: Cambridge University Press;  
824 1995.
- 825 65. R Core Team. R: A Language and Environment for Statistical Computing. In:  
826 *Computing RFFS*, editor. Vienna, Austria 2020.

- 827 66. Bivand RS. Progress in the R ecosystem for representing and handling spatial  
828 data. *Journal of Geographical Systems*. 2020. doi: 10.1007/s10109-020-00336-0.
- 829 67. Wilson G, Aruliah DA, Brown CT, Chue Hong NP, Davis M, Guy RT, et al. Best  
830 practices for scientific computing. *PLoS Biol*. 2014;12(1):e1001745. doi:  
831 10.1371/journal.pbio.1001745.
- 832 68. Alzate A, Janzen T, Bonte D, Rosindell J, Etienne RS, Belmaker J. A simple spatially  
833 explicit neutral model explains the range size distribution of reef fishes. *Global Ecol*  
834 *Biogeogr*. 2019;28(7):875-90. doi: 10.1111/geb.12899.
- 835 69. Salles T, Rey P, Bertuzzo E. Mapping landscape connectivity as a driver of species  
836 richness under tectonic and climatic forcing. *Earth Surface Dynamics*. 2019;7(4):895-  
837 910. doi: 10.5194/esurf-7-895-2019.
- 838 70. Giezendanner J, Bertuzzo E, Pasetto D, Guisan A, Rinaldo A. A minimalist model of  
839 extinction and range dynamics of virtual mountain species driven by warming  
840 temperatures. *PLoS One*. 2019;14(3):e0213775. Epub 2019/03/19. doi:  
841 10.1371/journal.pone.0213775.
- 842 71. van Etten J. R package gdistance: Distances and routes on geographical grids.  
843 *Journal of Statistical Software*. 2017;76(13). doi: 10.18637/jss.v076.i13.
- 844 72. Dobzhansky T. *Genetics and the origin of species*. Repr. ed. New York: Columbia  
845 University Press; 1982. 364 S. p.
- 846 73. Stanley SM. Population Size, Extinction, and Speciation: The Fission Effect in  
847 Neogene Bivalvia. *Paleobiology*. 1986;12(1):89-110.
- 848 74. Wisz MS, Pottier J, Kissling WD, Pellissier L, Lenoir J, Damgaard CF, et al. The role  
849 of biotic interactions in shaping distributions and realised assemblages of species:  
850 implications for species distribution modelling. *Biological Reviews Cambridge*  
851 *Philosophical Society*. 2013;88(1):15-30. doi: 10.1111/j.1469-185X.2012.00235.x.
- 852 75. Pontarp M, Petchey OL. Ecological opportunity and predator-prey interactions:  
853 linking eco-evolutionary processes and diversification in adaptive radiations.  
854 *Proceedings of the Royal Society B: Biological Sciences*. 2018;285(1874). Epub  
855 2018/03/09. doi: 10.1098/rspb.2017.2550.
- 856 76. Pellissier L, Descombes P, Hagen O, Chalmandrier L, Glauser G, Kergunteuil A, et  
857 al. Growth-competition-herbivore resistance trade-offs and the responses of alpine  
858 plant communities to climate change. *Funct Ecol*. 2018;32(7):1693-703. doi:  
859 10.1111/1365-2435.13075.
- 860 77. Pellissier L. Stability and the competition-dispersal trade-off as drivers of  
861 speciation and biodiversity gradients. *Frontiers in Ecology and Evolution*. 2015;3. doi:  
862 10.3389/fevo.2015.00052.
- 863 78. Ronce O. How Does It Feel to Be Like a Rolling Stone? Ten Questions About  
864 Dispersal Evolution. *Annual Review of Ecology, Evolution, and Systematics*.  
865 2007;38(1):231-53. doi: 10.1146/annurev.ecolsys.38.091206.095611.
- 866 79. Stegen JC, Enquist BJ, Ferriere R. Advancing the metabolic theory of biodiversity.  
867 *Ecol Lett*. 2009;12(10):1001-15. doi: 10.1111/j.1461-0248.2009.01358.x.
- 868 80. Gillooly JF, Allen AP, West GB, Brown JH. The rate of DNA evolution: Effects of  
869 body size and temperature on the molecular clock. *Proceedings of the National Academy*  
870 *of Sciences of the United States of America*. 2005;102(1):140-5. doi:  
871 10.1073/pnas.0407735101.
- 872 81. Ohta T. The nearly neutral theory of molecular evolution. *Annu Rev Ecol Syst*.  
873 1992;23(1):263-86. doi: pdf/10.1146/annurev.es.23.110192.001403.
- 874 82. Felsenstein J. Maximum-likelihood estimation of evolutionary trees from  
875 continuous characters. *Am J Hum Genet*. 1973;25(5):471.

- 876 83. Hansen TF. Stabilizing selection and the comparative analysis of adaptation.  
877 Evolution. 1997;51(5):1341-51.
- 878 84. MacArthur R, Levins R. The limiting similarity, convergence, and divergence of  
879 coexisting species. The American Naturalist. 1967;101(921):377-85. doi:  
880 10.1086/282505.
- 881 85. Cabral JS, Kreft H, Higgins S. Linking ecological niche, community ecology and  
882 biogeography: insights from a mechanistic niche model. J Biogeogr. 2012;39(12):2212-  
883 24. doi: 10.1111/jbi.12010.
- 884 86. Grimm V, Railsback SF. Pattern-oriented modelling: a 'multi-scope' for predictive  
885 systems ecology. Philosophical Transactions of the Royal Society B.  
886 2012;367(1586):298-310. Epub 2011/12/07. doi: 10.1098/rstb.2011.0180.
- 887 87. Lewin R. Biologists disagree over bold signature of nature. Science.  
888 1989;244(4904):527-9.
- 889 88. Lawton JH. Are there general laws in ecology? Oikos. 1999;84(2):177-92. doi:  
890 10.2307/3546712.
- 891 89. Swenson NG, Anglada-Cordero P, Barone JA. Deterministic tropical tree  
892 community turnover: evidence from patterns of functional beta diversity along an  
893 elevational gradient. Proceedings of the Royal Society B: Biological Sciences.  
894 2011;278(1707):877-84. Epub 2010/09/24. doi: 10.1098/rspb.2010.1369.
- 895 90. Anderson MJ, Crist TO, Chase JM, Vellend M, Inouye BD, Freestone AL, et al.  
896 Navigating the multiple meanings of beta diversity: a roadmap for the practicing  
897 ecologist. Ecol Lett. 2011;14(1):19-28. Epub 2010/11/13. doi: 10.1111/j.1461-  
898 0248.2010.01552.x.
- 899 91. Holt BG, Lessard J-P, Borregaard MK, Fritz SA, Araújo MB, Dimitrov D, et al. An  
900 update of wallace's zoogeographic regions of the world. Science. 2013;339(6115):74-8.  
901 doi: 10.1126/science.1228282.
- 902 92. Qian H, Ricklefs RE, White PS. Beta diversity of angiosperms in temperate floras  
903 of eastern Asia and eastern North America. Ecol Lett. 2005;8(1):15-22. doi:  
904 10.1111/j.1461-0248.2004.00682.x.
- 905 93. Bar-On YM, Phillips R, Milo R. The biomass distribution on Earth. Proceedings of  
906 the National Academy of Sciences. 2018;115(25):6506-11. Epub 2018/05/23. doi:  
907 10.1073/pnas.1711842115.
- 908 94. Brown JH. On the relationship between abundance and distribution of species.  
909 The American Naturalist. 1984;124(2):255-79. doi: 10.1086/284267.
- 910 95. Gaston KJ. Species-range-size distributions: patterns, mechanisms and  
911 implications. Trends Ecol Evol. 1996;11(5):197-201. doi: 10.1016/0169-  
912 5347(96)10027-6.
- 913 96. Gómez-Rodríguez C, Baselga A, Wiens JJ. Is diversification rate related to climatic  
914 niche width? Global Ecol Biogeogr. 2015;24(4):383-95. doi: 10.1111/geb.12229.
- 915 97. Lamanna C, Blonder B, Violle C, Kraft NJ, Sandel B, Simova I, et al. Functional trait  
916 space and the latitudinal diversity gradient. Proceedings of the National Academy of  
917 Sciences. 2014;111(38):13745-50. Epub 2014/09/17. doi: 10.1073/pnas.1317722111.
- 918 98. Rolland J, Salamin N. Niche width impacts vertebrate diversification. Global Ecol  
919 Biogeogr. 2016;25(10):1252-63. doi: 10.1111/geb.12482.
- 920 99. Morlon H. Phylogenetic approaches for studying diversification. Ecol Lett.  
921 2014;17(4):508-25. Epub 2014/02/19. doi: 10.1111/ele.12251.
- 922 100. Silvestro D, Warnock RCM, Gavryushkina A, Stadler T. Closing the gap between  
923 palaeontological and neontological speciation and extinction rate estimates. Nature

- 924 Communications. 2018;9(1):5237. Epub 2018/12/12. doi: 10.1038/s41467-018-  
925 07622-y.
- 926 101. Stadler T. Mammalian phylogeny reveals recent diversification rate shifts.  
927 Proceedings of the National Academy of Sciences. 2011;108(15):6187-92. Epub  
928 2011/03/30. doi: 10.1073/pnas.1016876108.
- 929 102. Hagen O, Hartmann K, Steel M, Stadler T. Age-dependent speciation can explain  
930 the shape of empirical phylogenies. Syst Biol. 2015;64(3):432-40. doi:  
931 10.1093/sysbio/syv001.
- 932 103. Manceau M, Lambert A, Morlon H. Phylogenies support out-of-equilibrium  
933 models of biodiversity. Ecol Lett. 2015;18(4):347-56. Epub 2015/02/26. doi:  
934 10.1111/ele.12415.
- 935 104. Swenson NG, Erickson DL, Mi X, Bourg NA, Forero-Montaña J, Ge X, et al.  
936 Phylogenetic and functional alpha and beta diversity in temperate and tropical tree  
937 communities. Ecology. 2012;93(sp8):S112-S25. doi: 10.1890/11-0402.1.
- 938 105. Graham CH, Fine PV. Phylogenetic beta diversity: linking ecological and  
939 evolutionary processes across space in time. Ecol Lett. 2008;11(12):1265-77. Epub  
940 2008/12/03. doi: 10.1111/j.1461-0248.2008.01256.x.
- 941 106. Morlon H, Schwilk DW, Bryant JA, Marquet PA, Rebelo AG, Tauss C, et al. Spatial  
942 patterns of phylogenetic diversity. Ecol Lett. 2011;14(2):141-9. Epub 2010/12/21. doi:  
943 10.1111/j.1461-0248.2010.01563.x.
- 944 107. Petchey OL, Gaston KJ. Functional diversity: back to basics and looking forward.  
945 Ecol Lett. 2006;9(6):741-58. Epub 2006/05/19. doi: 10.1111/j.1461-  
946 0248.2006.00924.x.
- 947 108. Silvestro D, Castiglione S, Mondanaro A, Serio C, Melchionna M, Piras P, et al. A  
948 450 million years long latitudinal gradient in age-dependent extinction. Ecol Lett.  
949 2020;23(3):439-46. Epub 2019/12/20. doi: 10.1111/ele.13441.
- 950 109. Igea J, Tanentzap AJ. Angiosperm speciation cools down in the tropics. Ecol Lett.  
951 2020;23(4):692-700. Epub 2020/02/12. doi: 10.1111/ele.13476.
- 952 110. Tittensor DP, Worm B. A neutral-metabolic theory of latitudinal biodiversity.  
953 Global Ecol Biogeogr. 2016;25(6):630-41. doi: 10.1111/geb.12451.
- 954 111. Storch D, Bohdalkova E, Okie J. The more-individuals hypothesis revisited: the  
955 role of community abundance in species richness regulation and the productivity-  
956 diversity relationship. Ecol Lett. 2018;21(6):920-37. Epub 2018/04/17. doi:  
957 10.1111/ele.12941.
- 958 112. Hurlbert AH, Stegen JC. When should species richness be energy limited, and how  
959 would we know? Ecol Lett. 2014;17(4):401-13. Epub 2014/01/08. doi:  
960 10.1111/ele.12240.
- 961 113. Kissling WD, Eiserhardt WL, Baker WJ, Borchsenius F, Couvreur TL, Balslev H, et  
962 al. Cenozoic imprints on the phylogenetic structure of palm species assemblages  
963 worldwide. Proceedings of the National Academy of Sciences. 2012;109(19):7379-84.  
964 Epub 2012/04/25. doi: 10.1073/pnas.1120467109.
- 965 114. Meseguer AS, Condamine FL. Ancient tropical extinctions at high latitudes  
966 contributed to the latitudinal diversity gradient. Evolution. 2020. Epub 2020/04/05.  
967 doi: 10.1111/evo.13967.
- 968 115. Zachos J, Pagani M, Sloan L, Thomas E, Billups K. Trends, rhythms, and  
969 aberrations in global climate 65Ma to present. Science. 2001;292(5517):686-93. doi:  
970 10.1126/science.1059412.

- 971 116. Straume EO, Gaina C, Medvedev S, Nisancioglu KH. Global Cenozoic  
972 Paleobathymetry with a focus on the Northern Hemisphere Oceanic Gateways.  
973 Gondwana Research. 2020;86:126-43. doi: 10.1016/j.gr.2020.05.011.
- 974 117. Scotese CR, Wright N. PALEOMAP Paleodigital Elevation Models (PaleoDEMS) for  
975 the Phanerozoic. 2018. Available from: [https://www.earthbyte.org/paleodem-resource-](https://www.earthbyte.org/paleodem-resource-scotese-and-wright-2018)  
976 [scotese-and-wright-2018](https://www.earthbyte.org/paleodem-resource-scotese-and-wright-2018).
- 977 118. Westerhold T, Marwan N, Drury AJ, Liebrand D, Agnini C, Anagnostou E, et al. An  
978 astronomically dated record of Earth's climate and its predictability over the last 66  
979 million years. Science. 2020;369(6509):1383-7. doi: 10.1126/science.aba6853.
- 980 119. Zhang L, Hay WW, Wang C, Gu X. The evolution of latitudinal temperature  
981 gradients from the latest Cretaceous through the Present. Earth-Sci Rev. 2019;189:147-  
982 58. doi: 10.1016/j.earscirev.2019.01.025.
- 983 120. Hollis CJ, Dunkley Jones T, Anagnostou E, Bijl PK, Cramwinckel MJ, Cui Y, et al.  
984 The DeepMIP contribution to PMIP4: methodologies for selection, compilation and  
985 analysis of latest Paleocene and early Eocene climate proxy data, incorporating version  
986 0.1 of the DeepMIP database. Geoscientific Model Development. 2019;12(7):3149-206.  
987 doi: 10.5194/gmd-12-3149-2019.
- 988 121. Hutchinson DK, de Boer AM, Coxall HK, Caballero R, Nilsson J, Baatsen M. Climate  
989 sensitivity and meridional overturning circulation in the late Eocene using GFDL CM2.1.  
990 Climate of the Past. 2018;14(6):789-810. doi: 10.5194/cp-14-789-2018.
- 991 122. Evans D, Sagoo N, Renema W, Cotton LJ, Muller W, Todd JA, et al. Eocene  
992 greenhouse climate revealed by coupled clumped isotope-Mg/Ca thermometry.  
993 Proceedings of the National Academy of Sciences. 2018;115(6):1174-9. Epub  
994 2018/01/24. doi: 10.1073/pnas.1714744115.
- 995 123. Cramwinckel MJ, Huber M, Kocken IJ, Agnini C, Bijl PK, Bohaty SM, et al.  
996 Synchronous tropical and polar temperature evolution in the Eocene. Nature.  
997 2018;559(7714):382-6. Epub 2018/07/04. doi: 10.1038/s41586-018-0272-2.
- 998 124. Sijp WP, von der Heydt AS, Dijkstra HA, Flögel S, Douglas PMJ, Bijl PK. The role of  
999 ocean gateways on cooling climate on long time scales. Global Planet Change.  
1000 2014;119:1-22. doi: 10.1016/j.gloplacha.2014.04.004.
- 1001 125. Keating-Bitonti CR, Ivany LC, Affek HP, Douglas P, Samson SD. Warm, not super-  
1002 hot, temperatures in the early Eocene subtropics. Geology. 2011;39(8):771-4. doi:  
1003 10.1130/g32054.1.
- 1004 126. Storch D, Okie JG, Field R. The carrying capacity for species richness. Global Ecol  
1005 Biogeogr. 2019;28(10):1519-32. doi: 10.1111/geb.12987.
- 1006 127. Hartig F, Calabrese JM, Reineking B, Wiegand T, Huth A. Statistical inference for  
1007 stochastic simulation models--theory and application. Ecol Lett. 2011;14(8):816-27.  
1008 Epub 2011/06/18. doi: 10.1111/j.1461-0248.2011.01640.x.
- 1009 128. Jenkins CN, Pimm SL, Joppa LN. Global patterns of terrestrial vertebrate diversity  
1010 and conservation. Proceedings of the National Academy of Sciences.  
1011 2013;110(28):E2602-10. Epub 2013/06/28. doi: 10.1073/pnas.1302251110.
- 1012 129. IUCN. IUCN Red List of threatened species. 2020 [cited 2020 1 Januray].  
1013 Available from: <http://www.iucnredlist.org>
- 1014 130. BirdLife International. Data zone BirdLife international 2020 [cited 2020 1  
1015 January]. Available from: <http://datazone.birdlife.org>.
- 1016 131. Descombes P, Leprieur F, Albouy C, Heine C, Pellissier L. Spatial imprints of plate  
1017 tectonics on extant richness of terrestrial vertebrates. J Biogeogr. 2017;44(5):1185-97.  
1018 doi: 10.1111/jbi.12959.



gen3sis: engine for eco-evolutionary biodiversity modelling

- 1019 132. Bininda-Emonds OR, Cardillo M, Jones KE, MacPhee RD, Beck RM, Grenyer R, et  
1020 al. The delayed rise of present-day mammals. *Nature*. 2007;446(7135):507-12. Epub  
1021 2007/03/30. doi: 10.1038/nature05634.
- 1022 133. Kuhn TS, Mooers AØ, Thomas GH. A simple polytomy resolver for dated  
1023 phylogenies. *Methods in Ecology and Evolution*. 2011;2(5):427-36. doi: 10.1111/j.2041-  
1024 210X.2011.00103.x.
- 1025 134. Pyron RA, Burbrink FT. Early origin of viviparity and multiple reversions to  
1026 oviparity in squamate reptiles. *Ecol Lett*. 2014;17(1):13-21. Epub 2013/08/21. doi:  
1027 10.1111/ele.12168.
- 1028 135. Pyron RA, Wiens JJ. Large-scale phylogenetic analyses reveal the causes of high  
1029 tropical amphibian diversity. *Proceedings of the Royal Society B: Biological Sciences*.  
1030 2013;280(1770):20131622. Epub 2013/09/13. doi: 10.1098/rspb.2013.1622.
- 1031 136. Meseguer AS, Antoine PO, Fouquet A, Delsuc F, Condamine FL, McGill B. The role  
1032 of the Neotropics as a source of world tetrapod biodiversity. *Global Ecol Biogeogr*.  
1033 2020;29(9):1565-78. doi: 10.1111/geb.13141.
- 1034 137. Rahbek C, Graves GR. Multiscale assessment of patterns of avian species richness.  
1035 *Proceedings of the National Academy of Sciences*. 2001;98(8):4534-9. doi:  
1036 10.1073/pnas.071034898.
- 1037 138. Aldous DJ. Stochastic models and descriptive statistics for phylogenetic trees,  
1038 from Yule to today. *Statistical Science*. 2001;16(1):23-34. doi: 10.1214/ss/998929474.
- 1039 139. Simpkins G. Progress in climate modelling. *Nature Climate Change*.  
1040 2017;7(10):684-5. doi: 10.1038/nclimate3398.
- 1041 140. Vogelsberger M, Marinacci F, Torrey P, Puchwein E. Cosmological simulations of  
1042 galaxy formation. *Nature Reviews Physics*. 2020;2(1):42-66. doi: 10.1038/s42254-019-  
1043 0127-2.
- 1044 141. Gaucherel C, Carpentier C, Geijzendorffer IR, Noûs C, Pommereau F. Discrete-  
1045 event models for conservation assessment of integrated ecosystems. *Ecological*  
1046 *Informatics*. 2020. doi: 10.1016/j.ecoinf.2020.101205.
- 1047 142. Schemske DW, Mittelbach GG, Cornell HV, Sobel JM, Roy K. Is There a Latitudinal  
1048 Gradient in the Importance of Biotic Interactions? *Annual Review of Ecology, Evolution,*  
1049 *and Systematics*. 2009;40(1):245-69. doi: 10.1146/annurev.ecolsys.39.110707.173430.
- 1050 143. Borregaard MK, Matthews TJ, Whittaker RJ, Field R. The general dynamic model:  
1051 towards a unified theory of island biogeography? *Global Ecol Biogeogr*. 2016;25(7):805-  
1052 16. doi: 10.1111/geb.12348.
- 1053 144. Levins R. The strategy of model building in population biology. *Am Sci*.  
1054 1966;54(4):421-31.
- 1055 145. Zurell D, Berger U, Cabral JS, Jeltsch F, Meynard CN, Münkemüller T, et al. The  
1056 virtual ecologist approach: simulating data and observers. *Oikos*. 2010;119(4):622-35.  
1057 doi: 10.1111/j.1600-0706.2009.18284.x.
- 1058 146. Morlon H, Lewitus E, Condamine FL, Manceau M, Clavel J, Drury J, et al. RPANDA:  
1059 an R package for macroevolutionary analyses on phylogenetic trees. *Methods in Ecology*  
1060 *and Evolution*. 2016;7(5):589-97. doi: 10.1111/2041-210x.12526.
- 1061 147. Tsirogiannis C, Sandel B. PhyloMeasures: a package for computing phylogenetic  
1062 biodiversity measures and their statistical moments. *Ecography*. 2016;39(7):709-14.  
1063 doi: 10.1111/ecog.01814.
- 1064 148. Laliberté E, Legendre P, Shipley B, Laliberté ME. Package 'FD': Measuring  
1065 functional diversity from multiple traits, and other tools for functional ecology. 2014.

gen3sis: engine for eco-evolutionary biodiversity modelling

- 1066 149. Cabral JS, Schurr FM. Estimating demographic models for the range dynamics of  
1067 plant species. *Global Ecol Biogeogr.* 2010;19(1):85-97. doi: 10.1111/j.1466-  
1068 8238.2009.00492.x.
- 1069 150. James S. Clark. Why trees migrate so fast: Confronting theory with dispersal  
1070 biology and the paleorecord. *The American Naturalist.* 1998;152(2):204-24. doi:  
1071 10.1086/286162.
- 1072 151. Quintero I, Wiens JJ. Rates of projected climate change dramatically exceed past  
1073 rates of climatic niche evolution among vertebrate species. *Ecol Lett.* 2013;16(8):1095-  
1074 103. Epub 2013/06/27. doi: 10.1111/ele.12144.
- 1075 152. Annan JD, Hargreaves JC. A new global reconstruction of temperature changes at  
1076 the Last Glacial Maximum. *Climate of the Past.* 2012;9(1):367-76. doi: 10.5194/cp-9-  
1077 367-2013.
- 1078 153. Scotese CR. Some thoughts on global climate change: the transition from  
1079 icehouse to hothouse. *Paleomap project.* 2015;21:1 (2).
- 1080 154. Boucot AJ, Xu C, Scotese CR, Morley RJ. *Phanerozoic paleoclimate: an atlas of*  
1081 *lithologic indicators of climate.* Tulsa, U.S.A.: Society of Economic Paleontologists and  
1082 *Mineralogists (Society for Sedimentary Geology);* 2013.
- 1083 155. Spicer RA. *Phytopaleoaltimetry: using plant fossils to measure past land surface*  
1084 *elevation.* In: Carina Hoorn, Allison Perrigo, Antonelli A, editors. *Mountains, Climate and*  
1085 *Biodiversity* Oxford: Wiley. Oxford: Wiley; 2018. p. 95-109.
- 1086 156. Warren BH, Hagen O, Gerber F, Thebaud C, Paradis E, Conti E. Evaluating  
1087 alternative explanations for an association of extinction risk and evolutionary  
1088 uniqueness in multiple insular lineages. *Evolution.* 2018;72(10):2005-24. Epub  
1089 2018/08/29. doi: 10.1111/evo.13582.
- 1090
- 1091

## 1092 **Supporting Information captions**

### 1093 *Animations*

1094 **Animation S1** *Reconstructed dynamic landscape L1 (i.e. world 65 Ma) with the*  
1095 *environmental values used for the main case study.*

1096 **Animation S2** *Reconstructed dynamic landscape L2 (i.e. world 65 Ma) with the*  
1097 *environmental values used for the main case study.*

1098 **Animation S3** *Theoretical dynamic landscape (i.e. theoretical island) with the environmental*  
1099 *values used for the supplementary case study.*

1100 **Animation S4** *Dynamic simulated biodiversity patterns (i.e. M2 L1 world from 65 Ma to the*  
1101 *present). The map shows the  $\alpha$  diversity and the top and right graphs indicate the richness*  
1102 *profile of longitude and latitude, respectively.*

### 1103 *Figures*

1104 **Figure S1** *Divergence increase per time-step  $d_i$  against the normalized occupied niche of*  
1105 *isolated populations for models (A) M0 and M2, which assume temperature-independent*  
1106 *divergence; and (B) M1, which assumes temperature-dependent divergence, where*  
1107 *divergence relates to the mean of the realized temperature with three different  $d_{power}$*   
1108 *values.*

1109 **Figure S2** *Non-exhaustive probability density functions of the explored dispersal parameters*  
1110 *in a Weibull distribution with shape  $\phi$  of 1, 2 and 5 and  $\Psi$  of 550, 650, 750 and 850.*

1111 **Figure S3** *Frequencies of simulated normalized LDG slope (histogram) with empirical LDG*  
1112 *for four main groups (dashed grey line) and acceptance range (red line). Frequencies for*

gen3sis: engine for eco-evolutionary biodiversity modelling

1113 *models (A) M0, (B) M1, (C) M2 with total frequency and frequency discriminated for each*  
1114 *landscape, i.e. L1 and L2.*

1115 **Figure S4** *Correlation of model parameters and three emerging patterns for all models and*  
1116 *landscapes (A) M0 L1, (B) M0 L2, (C) M1 L1, (D) M1 L2, (E) M2 L1, and (F) M2 L2.*

1117 *Emerging patterns: (i) phylogeny beta is the phylogenetic tree imbalance statistic measured*  
1118 *as the value that maximizes the likelihood in the  $\beta$ -splitting model; (ii) range quant 0.95% is*  
1119 *the value of the 95% quantile of the species range area distribution and; (iii) LDG slope is*  
1120 *the slope of the linear regression of species richness.*

1121 **Figure S5** *Effects of grid cell size on simulations of M2 L1. (A) Correlation of grid cell, LDG*  
1122 *slope and other summary statistics. (B) Simulated LDG slope and grid cell size, showing a*  
1123 *significant effect of spatial resolution on LDG slope.*

1124 **Figure S6** *Normalized richness of (A) selected simulation, (B) terrestrial mammals, (C) birds,*  
1125 *(D) amphibians and (E) reptiles, with Pearson correlation values for comparisons between*  
1126 *simulated and empirical data.*

1127 **Figure S7** *Results of the island case study showing (A) landscape size and environmental*  
1128 *dynamics and (B) results of three experiments (i.e. lower, equal and higher trait evolution*  
1129 *compared with the temporal environmental variation). The time series in (B) shows  $\gamma$*   
1130 *richness (log10 scale) on theoretical oceanic islands, following the geomorphological*  
1131 *dynamics of islands. Thick lines indicate the average of the replicates, whereas thin lines*  
1132 *indicate SD envelopes (n=30 for each trait evolutionary rate scenario). The dashed grey*  
1133 *vertical bar crossing the entire plot indicates the period in which the island reaches its*  
1134 *maximum size.*

gen3sis: engine for eco-evolutionary biodiversity modelling

1135 *Notes*

1136 **Note S1** *Global case study: emergence of the LDG from environmental changes of the*

1137 *Cenozoic.*

1138 **Note S2** *Island case study: does trait evolution impact biodiversity dynamics?*

1139 **Note S3** *Gen3sis pseudo-code.*
